## **Spike-frequency dependent coregulation of multiple ionic conductances in fast-spiking cells forces a metabolic tradeoff**

Yue Ban<sup>1,2\*</sup>, Rosalie Maltby<sup>1</sup>, and Michael R. Markham<sup>1,2</sup>

<sup>1</sup>Department of Biology, University of Oklahoma, Norman, OK 73019, USA

<sup>2</sup>Cellular & Behavioral Neurobiology Graduate Program, University of Oklahoma, Norman, OK 73019, USA

\*Corresponding author  
University of Oklahoma  
Biology Department  
730 Van Vleet Oval, RH410  
Norman, OK 73019

Email: [yueban610@gmail.com](mailto:yueban610@gmail.com)

Pages: 61

Word count: 13710

1  
2  
3  
4  
5  
6  
7  
8  
9  
10  
11  
12  
13  
14

## ABSTRACT

High-frequency action potentials (APs) allow rapid information acquisition and processing in neural systems, but create biophysical and metabolic challenges for excitable cells. The electric fish *Eigenmannia virescens* images its world and communicates with high-frequency (200-600 Hz) electric organ discharges (EODs) produced by synchronized APs generated at the same frequency in the electric organ cells (electrocytes). We cloned three previously unidentified Na<sup>+</sup>-activated K<sup>+</sup> channel isoforms from electrocytes (eSlack1, eSlack2, and eSlick1). In electrocytes, mRNA transcript levels of the rapidly-activating eSlick, but not the slower eSlack1 or eSlack2, correlated with EOD frequency across individuals. In addition, transcript levels of an inward-rectifier K<sup>+</sup> channel, a voltage-gated Na<sup>+</sup> channel, and Na<sup>+</sup>,K<sup>+</sup>-ATPases also correlated with EOD frequency while a second Na<sup>+</sup> channel isoform did not. Computational simulations showed that maintaining electrocyte AP waveform integrity as firing rates increase requires scaling conductances in accordance with these mRNA expression correlations, causing AP metabolic costs to increase exponentially.

15 **INTRODUCTION**

16 Organisms expend precious metabolic energy to acquire, process, and store information.  
17 Action potentials (APs) are central to these processes because they are a fundamental unit of  
18 information in nervous systems. As a result, the rules that govern these energy-information  
19 tradeoffs are often revealed in the biophysical mechanisms of AP generation [1, 2]. APs in  
20 excitable cells are initiated by depolarizing inward  $\text{Na}^+$  currents and terminated by repolarizing  
21 outward  $\text{K}^+$  currents. Each AP incurs a metabolic cost when the  $\text{Na}^+, \text{K}^+$ -ATPases hydrolyze ATP  
22 to restore the transmembrane  $\text{Na}^+$  and  $\text{K}^+$  gradients after each AP. The kinetics and densities of  
23 the  $\text{Na}^+$  and  $\text{K}^+$  ion channels that generate these APs determine the waveform of each individual  
24 AP, the maximum AP firing rate and, ultimately, the metabolic costs of AP generation.  
25 Sustaining high AP firing frequencies supports rapid information acquisition and processing [3-  
26 5], but presents a significant metabolic challenge for two reasons. First, the very feature of high  
27 firing rates imposes metabolic costs by virtue of more APs per unit time. Second, maintaining  
28 high firing rates requires very brief APs, and the generation of brief APs often requires the  
29 metabolically inefficient overlap of depolarizing  $\text{Na}^+$  currents and repolarizing  $\text{K}^+$  currents [6].

30 The freshwater weakly electric fish *Eigenmannia virescens* generates high-frequency  
31 electric organ discharges (EODs) to image their world and communicate in darkness (Fig. 1) [7].  
32 *E. virescens* has a considerable animal-to-animal variability in EOD frequency (EODf) which is  
33 set by a medullary pacemaker nucleus, with each fish maintaining a relatively fixed frequency in  
34 the range of 200-600 Hz [8]. Early studies on the behavior of *E. virescens* suggested that EODf  
35 conveys information about individual identity, gender and dominance rank [7, 9]. These high-  
36 frequency EODs confer two major advantages by providing fast sensory sampling rates and

37 shifting the signal energy away from low frequencies that are detectable by electroreceptive  
38 predators [10], but high-frequency EODs also incur staggering metabolic costs [11].

39 The EOD is produced by more than 1000 electric organ cells (electrocytes) that generate  
40 near simultaneous APs at the EOD frequency (200-600 Hz), approximately the same frequency  
41 range as the maximum sustained firing rates for fast-spiking mammalian cortical neurons [12]  
42 and brainstem auditory neurons [13]. However, electrocytes maintain these high frequencies  
43 unremittingly throughout the lifespan, whereas central neurons sustain such high firing rates only  
44 for brief periods. Further, in addition to the biophysical and metabolic challenges associated with  
45 maintaining constant high-frequency APs, the resulting metabolic costs are amplified in *E.*  
46 *virescens* electrocytes because electrocyte ionic currents can exceed 10  $\mu\text{A}$  during each AP, with  
47 corresponding entry of approximately  $2 \times 10^{10}$   $\text{Na}^+$  ions into the cell during each AP [11, 14].  
48 These large ionic currents create extreme metabolic demands because one ATP must be  
49 hydrolyzed by the  $\text{Na}^+, \text{K}^+$ -ATPase for every three  $\text{Na}^+$  ions returned to the extracellular space.  
50 High firing rates also create extreme demand for rapid charge translocation by the  $\text{Na}^+, \text{K}^+$ -  
51 ATPases because the interval for restoring ionic gradients between APs ranges from just 2.5 ms  
52 to as little as 0.8 ms across the EODf range of 200-600 Hz.

53 Here we investigated the ionic mechanisms associated with high-frequency APs in *E.*  
54 *virescens* electrocytes and the associated demands on  $\text{Na}^+, \text{K}^+$ -ATPase activity. Electrocytes are  
55 highly polarized cells approximately 1.5 mm in length and 500  $\mu\text{m}$  in diameter. APs are initiated  
56 with the activation of cholinergic receptors and  $\text{Na}_v$  channels on the innervated posterior  
57 membrane to allow the influx of  $\text{Na}^+$  (Fig. 1). Electrocytes in *E. virescens* terminate APs with  
58  $\text{Na}^+$ -activated  $\text{K}^+$  ( $\text{K}_{\text{Na}}$ ) channels rather than the voltage gated  $\text{K}^+$  ( $\text{K}_v$ ) channels that terminate  
59 the AP in the electrocytes of related species [14-17].

60 Numerous studies have suggested that the density and kinetic properties of  $K^+$  channels  
61 in the plasma membrane are key determinants of an excitable cell's functional capacity [18-23].  
62 Therefore, we cloned the cDNAs encoding the  $K_{Na}$  channels in *E. virescens* EOs and identified  
63 three different types of  $K_{Na}$  channel subunits expressed in electrocytes. Two of these channels,  
64 eSlack1 and eSlack2, closely resemble  $K_{Na}$  channels encoded by the Slack gene in mammalian  
65 systems; and the third channel, eSlick, shares the highest homology to the Slick channel in rat.  
66 By expressing fluorescent protein tagged  $K_{Na}$  channel subunits in electrocytes, we showed that  
67 all three  $K_{Na}$  channels are expressed on the cell's anterior region, separated by >1 mm from the  
68  $Na_v$  channels which are restricted to the posterior membrane.

69 We also examined the functional differences among the three  $K_{Na}$  channels by expressing  
70 them in *X. laevis* oocytes. Recordings of whole cell currents showed that eSlick currents are  
71 activated much more rapidly than eSlack1 currents. To explore which conductances play key  
72 roles in determining the firing frequency of electrocytes, we used qRT-PCR to measure the  
73 mRNA levels of genes encoding ion channels and  $Na^+/K^+$  ATPases in EO from fish with  
74 different EODf. The transcription levels of eSlick,  $Na_v1.4a$ , Kir6.2 and  $Na^+/K^+$  ATPase increase  
75 with EODf, while transcription levels of eSlack1, eSlack2,  $Na_v1.4b$  did not correlate with EODf.

76 In computational simulations of electrocytes stimulated at a broad range of EODfs, we  
77 found that maintaining AP integrity across firing rates required scaling ionic conductances in  
78 accordance with our experimentally derived mRNA expression correlations. These simulations  
79 also revealed that AP metabolic costs and the rate of required charge translocation by the  
80  $Na^+,K^+$ -ATPases increased exponentially with higher frequencies.

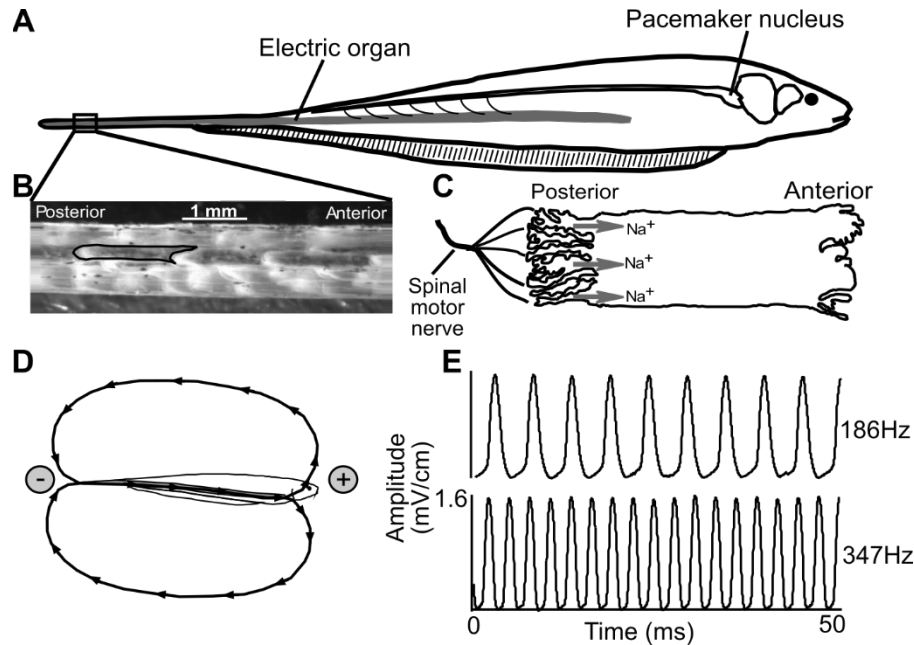

81

**Fig.1. EOD generation in *E. virescens*.** *A*: The EO runs longitudinally along the fish body and extends into the caudal tail filament. *B*: A section from the tail with skin removed to expose the EO. A single electrocyte is outlined in black. *C*: Schematic of an electrocyte. Electrocytes are highly polarized cells approximately 1.5 mm in anterior-posterior length and 0.6 mm in diameter. Electrocyte APs are controlled by the medullary pacemaker nucleus via spinal motor neurons innervating on the posterior membrane of each electrocyte. The cell's innervated posterior face is deeply invaginated and occupied by cholinergic receptors and voltage gated Na<sup>+</sup> (Na<sub>v</sub>) channels. The activation of cholinergic synapses causes an inward Na<sup>+</sup> current. *D*: The Na<sup>+</sup> current moves toward the head, and followed by a return path from head to tail in the surrounding water. *E*: The EOD waveforms recorded from fish with high and low EOD frequency. Panels A-D were modified from Ban et al., 2015.

82

## RESULTS

### 83 Molecular identities of K<sub>Na</sub> channels in *E. virescens* electrocytes

84 Mammalian K<sub>Na</sub> channels are encoded by two highly similar paralog genes, *Slo2.1* (*Slick*,  
85 *kcnt2*) and *Slo2.2* (*Slack*, *kcnt1*) belonging to the *Slo* gene family [24, 25]. In *E. virescens* EOs,  
86 we cloned three full-length cDNAs similar to the mammalian *Slo2* transcripts. Phylogenetic  
87 analysis (Fig. 2A) of channels in the SLO family show that two cloned cDNAs have the  
88 strongest homology with mammalian *Slack* transcripts, and the third full-length cDNA is more  
89 closely related to known *Slick* transcripts. The open reading frames (ORFs) of the two *E.*  
90 *virescens* *Slack* genes encode two proteins that consist of 1164 and 1030 amino acids,

91 respectively, which share 68.6% homology. Amino acid differences between the two *Slack*  
92 proteins were dispersed along the entire sequence, suggesting they are not likely generated by  
93 RNA alternative splicing. Given the evidence that duplication of voltage gated sodium and  
94 potassium channel genes has occurred in multiple gymnotiform species [21, 26], gene  
95 duplication is more likely the mechanism giving rise to the two Slack transcript variants in *E.*  
96 *virescens*. We designated the duplicated *Slack* genes in *E. virescens* as *eSlack1* (ORF: 3495 nt)  
97 and *eSlack2* (ORF: 3093 nt). Therefore, *E. virescens* EOs express three different  $K_{Na}$  channel  
98 subunits, encoded by both *Slack* and *Slick* genes.

99         In all but one genus of weakly electric fish, electric organs (EOs) are derived from  
100 skeletal muscle [27]. With the development and maturation of EOs, electrocytes eliminate the  
101 coupling between contraction and excitability [28, 29]. Due to the myogenic origin of EO tissue,  
102 we examined the expression pattern of *eSlack1*, *eSlack2*, and *eSlick* in *E. virescens* muscle and  
103 EO by reverse transcription PCR and found that *eSlack1* and *eSlack2* are expressed in both EO  
104 and muscle, whereas *Slick* is expressed only in the EO (Fig. 2B).

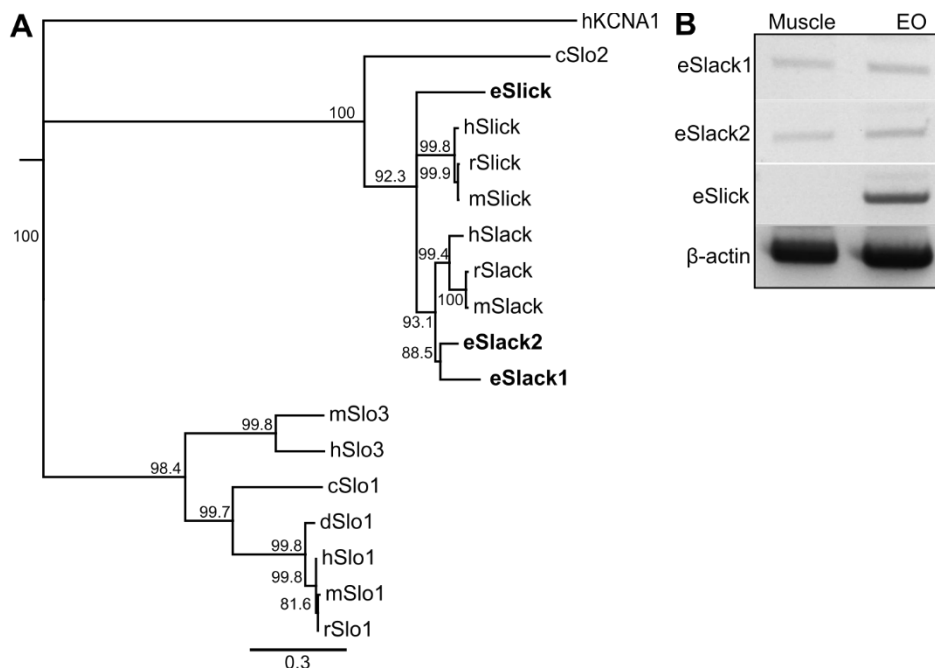

105

**Fig. 2. Molecular identities of *E. virescens* K<sub>Na</sub> channel genes.** *A*: A rooted neighbor-joining phylogenetic tree for the high conductance potassium channels in the SLO family. The family of SLO channels includes Slo1 (the “big” potassium (BK) K<sub>Ca</sub> channel), Slo2.1 (the Slick K<sub>Na</sub> channel), Slo2.2 (the Slack K<sub>Na</sub> channel), and Slo3 (the large conductance pH-sensitive K<sup>+</sup> channel). Human Kv1.1 was used as the outgroup. (h: *Homo sapiens*; r: *Rattus norvegicus*; m: *Mus musculus*; d: *Danio rerio*; c: *Caenorhabditis elegans*; e: *Eigenmannia virescens*). *B*: Expression pattern of *E. virescens* K<sub>Na</sub> channels in muscle and EO. eSlack1 and eSlack2 were amplified from the cDNA of both muscle and EO, whereas eSlick was only amplified from EO cDNA. Primers and amplicon sizes are listed in Table 1.

106

## 107 Sequence and Structure of *E. virescens* K<sub>Na</sub> Channels

108 The *E. virescens* eSlack1 and eSlack2 channel subunits share 74.3% and 70.8%  
109 homology to rat Slack-A, respectively [30]. Consistent with the structure of mammalian Slack  
110 channel subunits, both eSlack1 and eSlack2 subunits are predicted to contain six membrane-  
111 spanning domains (S1-S6) with a pore-forming loop between S5 and S6, and an extensive  
112 cytoplasmic C-terminal region (Fig. 3) [24, 31-33]. Slack channels are activated by intracellular  
113 Na<sup>+</sup> ions, and the sensitivity of these channels to Na<sup>+</sup> is determined by the presence of a Na<sup>+</sup>  
114 coordination motif in the second Regulator of K<sup>+</sup> conduction (RCK) domain. This motif contains



115 six amino acids in rat Slack subunits (DNKPDH), with aspartic acid (D) and histidine (H) in the  
116 beginning and ending position [34]. In the homologous position, *E. virescens* Slack-1 and Slack-  
117 2 subunits have the sequence DNQPDDH and DNPPDNH respectively, making them putative  
118 Na<sup>+</sup> binding sites (Fig. 3A). There is great divergence between *E. virescens* Slack-1 and Slack-2  
119 in the N- and C- terminus. eSlack2 has a C-terminal tail approximately 100 amino acids shorter  
120 than eSlack1 and all other identified Slack and Slick subunits in mammals (Fig. 2A). The N-  
121 terminus is where amino acid differences are most frequently found between eSlack1 and  
122 eSlack2. The N-terminus of eSlack2 is highly similar to that of mouse and rat Slack-A. In  
123 mammals, RNA alternative splicing gives rise to three Slack transcripts, Slack-A, Slack-B and  
124 Slack-M, which are regulated by alternative promoters and differ in the N-terminal residues [30].  
125 eSlack1 has a unique N-terminus which is not similar to any known mammalian Slack isoforms  
126 (Fig. 3).

Coregulation of ionic conductances - 10

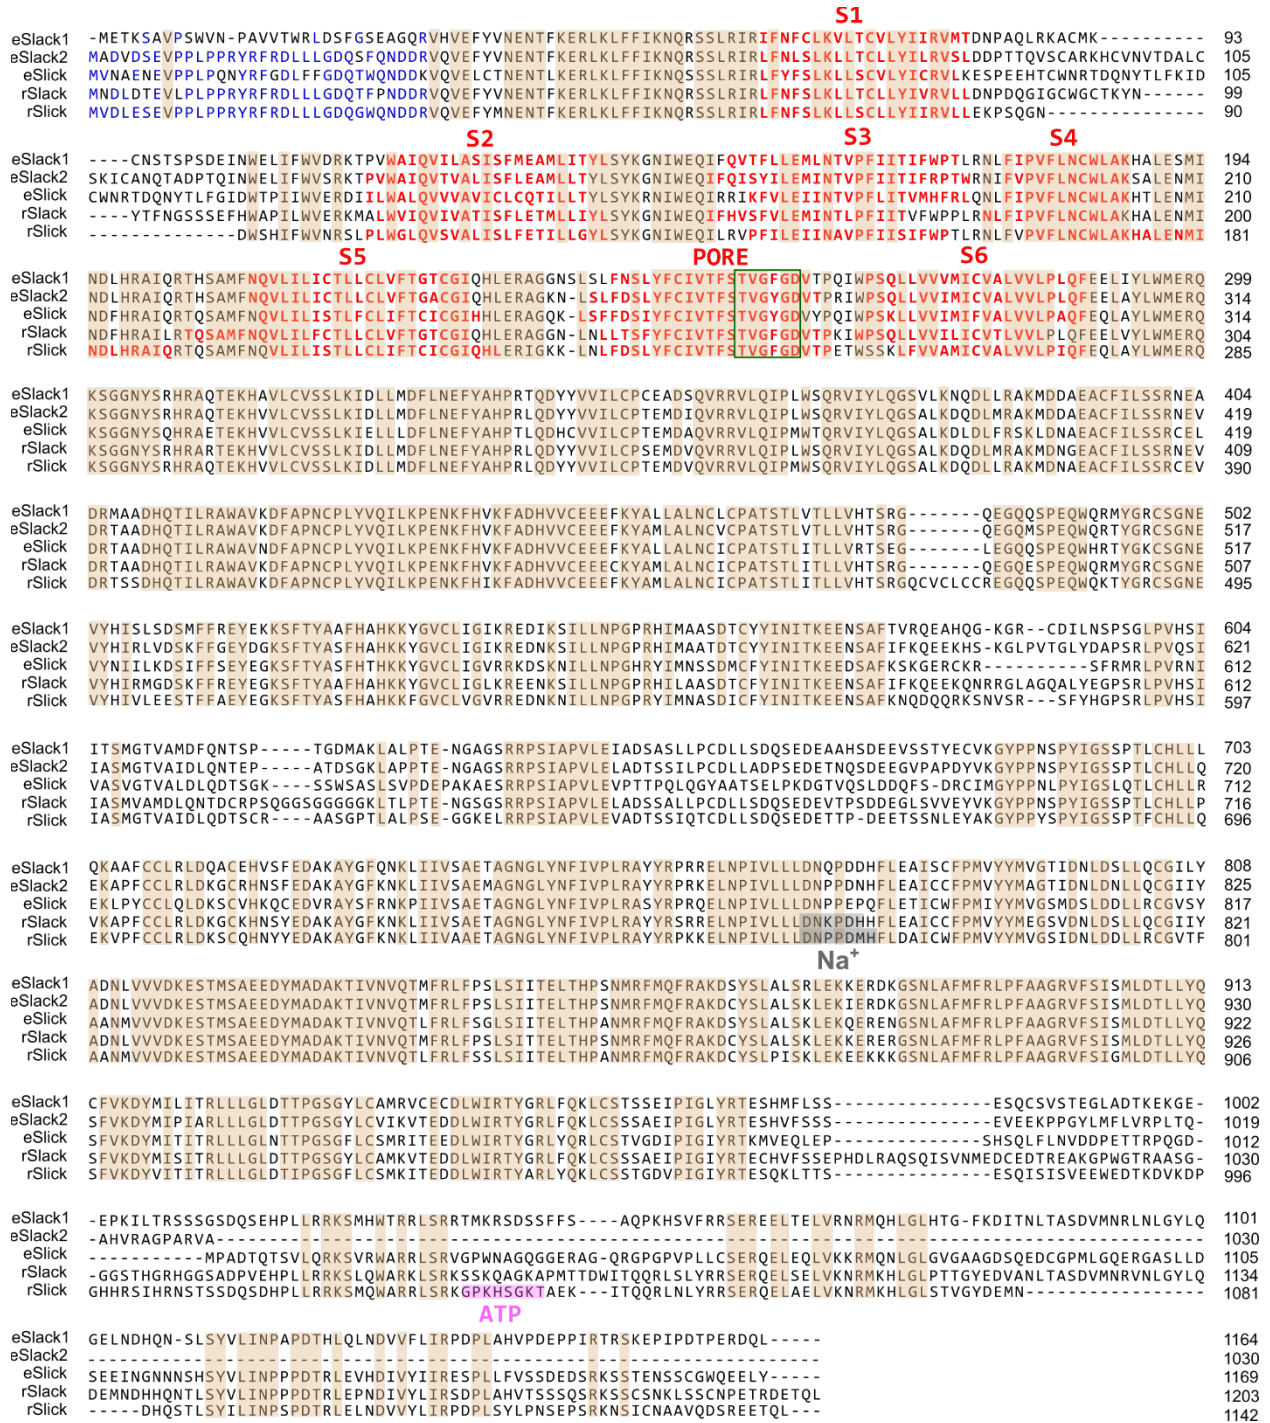

**Fig. 3. Amino acid sequences of *E. virescens* K<sub>Na</sub> channels.** *A*: Multiple sequence alignment was run by the Clustal W program using the *Geneious* software. Identical amino acids among all five sequences are shaded in brown except the C-terminal tail, where residues shared by eSlack1, eSlick, rSlack and eSlick are also highlighted. Gaps are represented by dashed lines. In the cytoplasmic N-terminus, identical residues are colored in blue. Red residues represent the membrane spanning domains (S1-6) and the pore region (P) of the five K<sub>Na</sub> channels. Within the pore forming loop, the conserved residues determining the channel's specific selectivity to K<sup>+</sup> ions are highlighted with green box. Residues shaded in gray represent the Na<sup>+</sup> coordination motifs in rat Slack and Slick. Residues composing the ATP binding motif of rat Slick are shaded in magenta.

128           The ORF of *E. virescens* Slick encodes a protein composed of 1142 amino acids, sharing  
129   66.6% homology with rat Slick subunits. It has an N-terminus closely resembling that of eSlack2  
130   and rat Slick, six predicted membrane spanning domains (S1-S6) with a pore-forming loop  
131   between S5 and S6, and an extensive C-terminal region (Figs. 3,4). At the homologous position  
132   of the Na<sup>+</sup> coordination motif of rat Slick subunit (DNPPDMH) [35], *E. virescens* Slick has the  
133   sequence DNPPEPQ, which shares four of seven residues in common with rat Slick, and does  
134   not end with histidine (H). Histidine (H) may not be necessary for binding Na<sup>+</sup>, as it was shown  
135   in rat Slick that mutation of the aspartic acid (D) residue dramatically decreased the channel's  
136   sensitivity to Na<sup>+</sup>, whereas histidine (H) substitution barely changed the channel's function [35].  
137   Rat and human Slick channels are ATP-regulated channels, and can be directly inhibited by  
138   intracellular ATP. The molecular determinants of ATP sensitivity is the presence of the "Walker  
139   A motif" (GxxxxGKT) on the distal C-terminus of Slick subunits [25, 36]. The residues at the  
140   homologous position of the "Walker A motif" in rat Slick are not well conserved between rat and  
141   *E. virescens* Slick. Furthermore, there is no motif having the signature residues of the "Walker  
142   A motif" in the C-terminus of *E. virescens* Slick subunits. Whether *E. virescens* Slick channels  
143   are regulated by intracellular ATP levels needs to be determined by future electrophysiology  
144   studies.

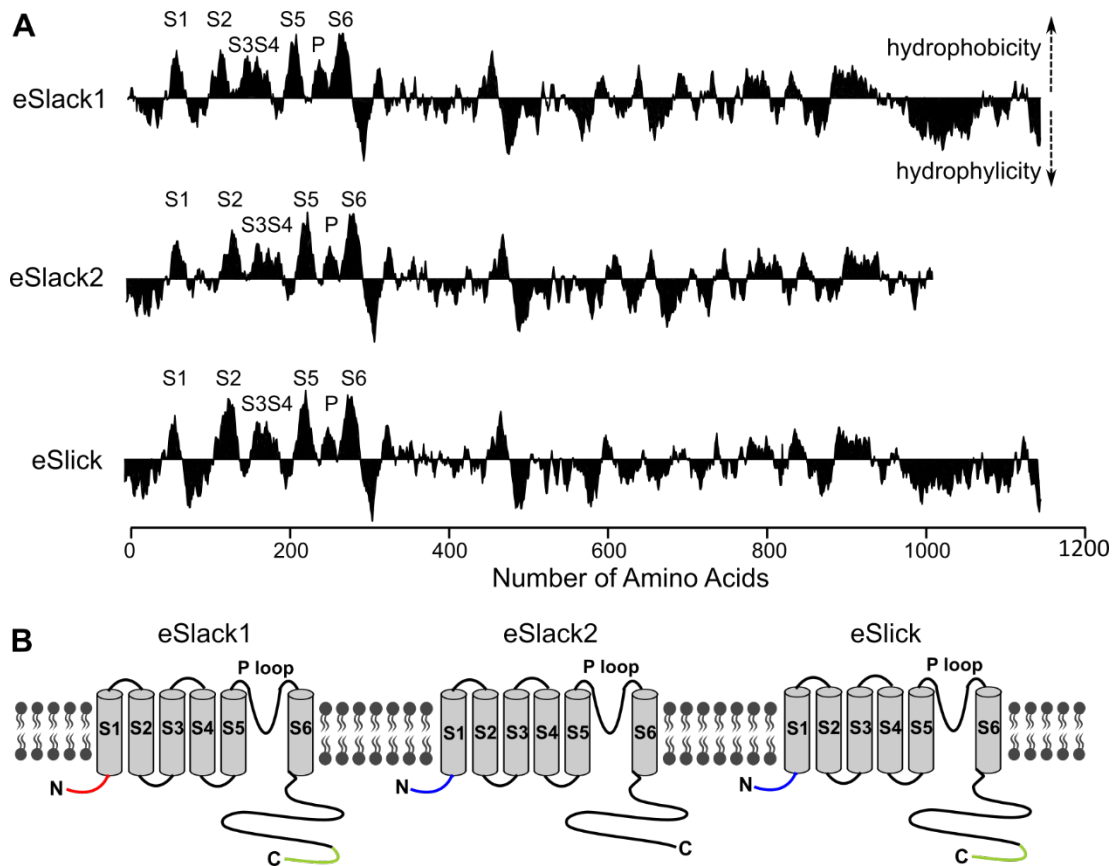

145

**Fig 4. Predicted secondary structure of *E. virescens* K<sub>Na</sub> channels.** *B*: Kyte-Doolittle hydrophilicity plot of *E. virescens* K<sub>Na</sub> channels (window size of 19 amino acids). *C*: Schematic representation of *E. virescens* K<sub>Na</sub> channel subunits. eSlack2 and eSlick have identical N-terminus (blue), which is different from that of eSlack1 (red). The C-terminal tail of eSlack2 is shorter than that of eSlack1 and eSlick (green).

146

## 147 Expression patterns of Slack and Slick channels in electrocytes

148 The subcellular localization of ion channels plays a key role in determining the  
149 bioelectrical properties of excitable cells, especially for electrocytes, which are highly polarized  
150 cells with structurally and biophysically different posterior and anterior membranes. Our  
151 previous immunohistochemical studies revealed that K<sub>Na</sub> channels are located on the anterior  
152 region, separated by >1 mm from cholinergic receptors and Na<sup>+</sup> channels restricted to the  
153 posterior membrane [37]. Protein sequence alignment between the peptide immunogen of an  
154 anti-Slack antibody we previously validated with *E. virescens* (Aviva Systems Biology,

155 OAAJ11822) [38] and the three *E. virescens* K<sub>Na</sub> subunits showed that the K<sub>Na</sub> channel antibody  
156 likely targeted only the eSlack1 subunit. Due to the lack of specific commercially-available  
157 antibodies and the failure of multiple custom-generated antibodies to produce specific labeling of  
158 eSlack2 and eSlick channels, we took the approach of expressing fluorescent protein tagged  
159 constructs of these ion channel subunits to visualize the location of eSlack2 and eSlick subunits  
160 in electrocytes. It has been shown that direct injection of naked DNA plasmids encoding  
161 transgenes produced expression of those transgenes in fish muscle [39]. Electrocytes of *E.*  
162 *virescens* can reliably express fluorescent protein tagged actin following bulk injection of Actin-  
163 GFP expression vectors into the EO (M. Markham and H. Zakon: unpublished observations).  
164 Because electrocytes exhibit autofluorescence with excitation and emission spectra similar to  
165 those of green fluorescent protein [37], we therefore used a red fluorescent protein (mCherry) as  
166 the tag to construct the recombinant *E. virescens* K<sub>Na</sub> channel subunits.

167 mCherry was fused to the N-terminus of eSlack1, eSlack2, and eSlick subunits and  
168 separated by a flexible polylinker containing glycine (G) polypeptide with serine (S) inserts to  
169 allow the proper folding and function of both molecules [40-42]. The fusion of a fluorescent  
170 protein to a native protein may affect the protein's normal localization. To ensure N-terminal  
171 mCherry fusion does not affect the trafficking of eSlack/Slick subunits to the plasma membrane,  
172 we examined the membrane expression of these recombinant K<sub>Na</sub> channel subunits in *Xenopus*  
173 *laevis* (*X. laevis*) oocytes and showed that all of them could be successfully expressed on cell  
174 membranes (Fig. 5A). Next we injected mCherry-eSlack1, mCherry-eSlack2, or mCherry-eSlick  
175 expression vectors into the EO and performed live-cell imaging of electrocytes 10 days later. We  
176 found that mCherry-eSlack1 localized on the anterior region of the electrocyte, mimicking the  
177 distribution of endogenous eSlack1 detected by immunohistochemistry [38] (Fig. 5C), providing

178 evidence that N-terminal mCherry fusion does not affect the normal localization of eSlack/Slick  
179 subunits. Similar to mCherry-eSlack1, the expression of mCherry-eSlack2 and mCherry-eSlick  
180 was only detected on the anterior region (Fig. 5D,E). These results indicate that the three *E.*  
181 *virescens*  $K_{Na}$  channel subunits all are expressed only on the anterior region of the electrocyte.

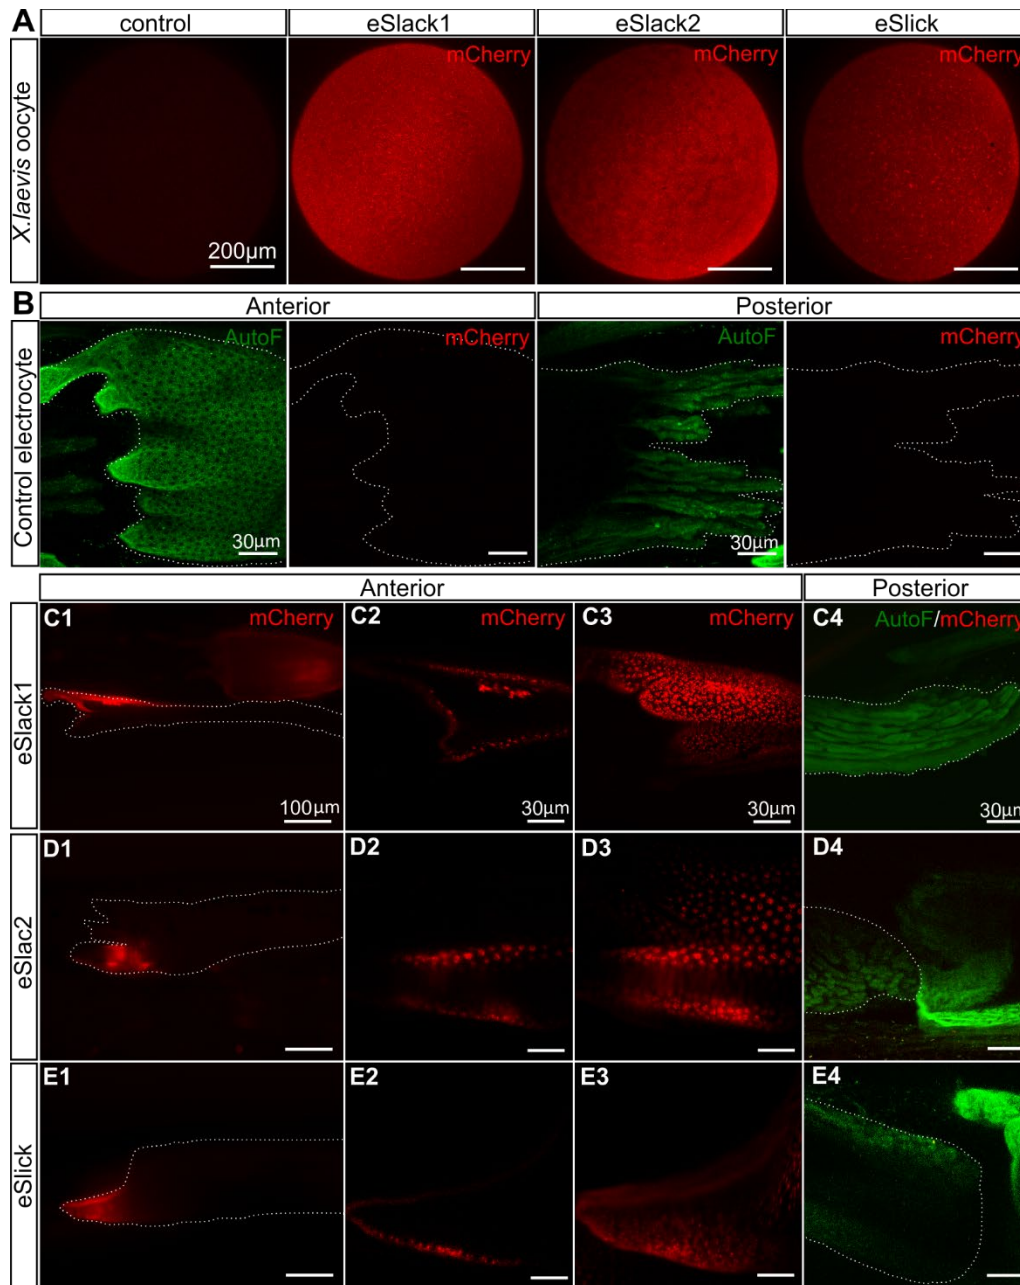

**Fig. 5. Expression of mCherry-tagged  $K_{Na}$  channels on the plasma membrane of *X. laevis* oocytes and localization of  $K_{Na}$  channels in electrocytes.** A. Maximum-intensity-projection (MIP) images of *X. laevis* oocytes expressing mCherry tagged *E. virescens*  $K_{Na}$  channels rendered with images taken at different focal planes. B: MIP images of a control electrocyte (no expression of mCherry-tagged  $K_{Na}$  channels). Broadband tissue autofluorescence (AutoF, green) was excited by a 488-nm laser. C-E: Representative images of electrocytes expressing mCherry-eSlack/Slick plasmids on the anterior region. Images in C1, D1 and E1, acquired using an epifluorescent microscope, show a larger field of view. Other images in C-E were acquired by laser-scanning confocal microscope. Images displayed in C2, D2 and E2 are single optical sections showing the anterior face from cells expressing recombinant  $K_{Na}$  channels (red). C3, D3 and E3 are MIP images rendered from the serial optical sections shown in C2, D2 and E2. Merged images of autofluorescence (green) and mCherry (red) in C4, D4 and E4 revealed that recombinant  $K_{Na}$  channels are not expressed on the posterior membrane of electrocytes. White dotted lines indicate the boundary of electrocytes.

### 183 **Characteristics of eSlack/eSlick currents**

184           The only outward  $K^+$  current in *E. virescens* electrocytes is a noninactivating  $Na^+$ -  
185 activated  $K^+$  current ( $I_{KNa}$ ) [14]. To determine how the three  $K_{Na}$  channels identified here  
186 contribute to outward  $K^+$  currents, we expressed these  $K_{Na}$  channels in *X. laevis* oocytes to  
187 characterize and compare their electrophysiological properties. Both eSlack1 and eSlick  
188 constructs produced robust outward  $K^+$  currents. Whole-cell currents from cells injected with  
189 eSlack1 cRNA showed much slower activation than those injected with eSlick cRNA (Fig. 6A).  
190 At test potentials positive to -40 mV, eSlack1 activates with relatively slow time constants (Fig.  
191 6A and B). The  $\tau$ -V relationship eSlack1 activation shows that eSlack1 currents activate slower  
192 as membrane potential becomes more depolarized until +10 mV, after which activation becomes  
193 more rapid with more depolarized membrane potentials (Fig. 6C). In contrast, eSlick shows rapid  
194 activation. Whole-cell currents in eSlick cRNA injected oocytes activated nearly instantaneously  
195 with step changes in voltage to test potentials positive to -70mV (Fig. 6A and B). eSlick  
196 activation  $\tau$  decreases with more depolarized membrane potentials reaching a minimum at +20  
197 mV (Fig. 6D). The plateau is likely due to the inward-rectification. We used water-injected  
198 oocytes as controls. As reported previously, control cells could express an endogenous  $Ca^{+}$ -  
199 activated  $Cl^-$  current and  $Na^+$ -activated  $K^+$  current, the magnitude of which is much smaller  
200 compared to cells expressing exogenous currents (Fig. 6A) [43, 44]. Unlike for eSlack1 and  
201 eSlick, oocytes injected with eSlack2 cRNA expressed currents which are not distinguishable  
202 from those of control cells (Fig. 6A). The C-terminal tail of eSlack2 is approximately 100-amino  
203 acids shorter than eSlack1 and eSlick. Since mCherry-eSlack2 can be expressed on the plasma  
204 membrane of both *X. laevis* oocytes and electrocytes, the absence of currents is not likely due to



205 the difficulty of trafficking eSlack2 into the plasma membrane. A likely possibility is that  
206 eSlack2 cannot form functional homotetrameric channels without the intact C-terminus.  
207

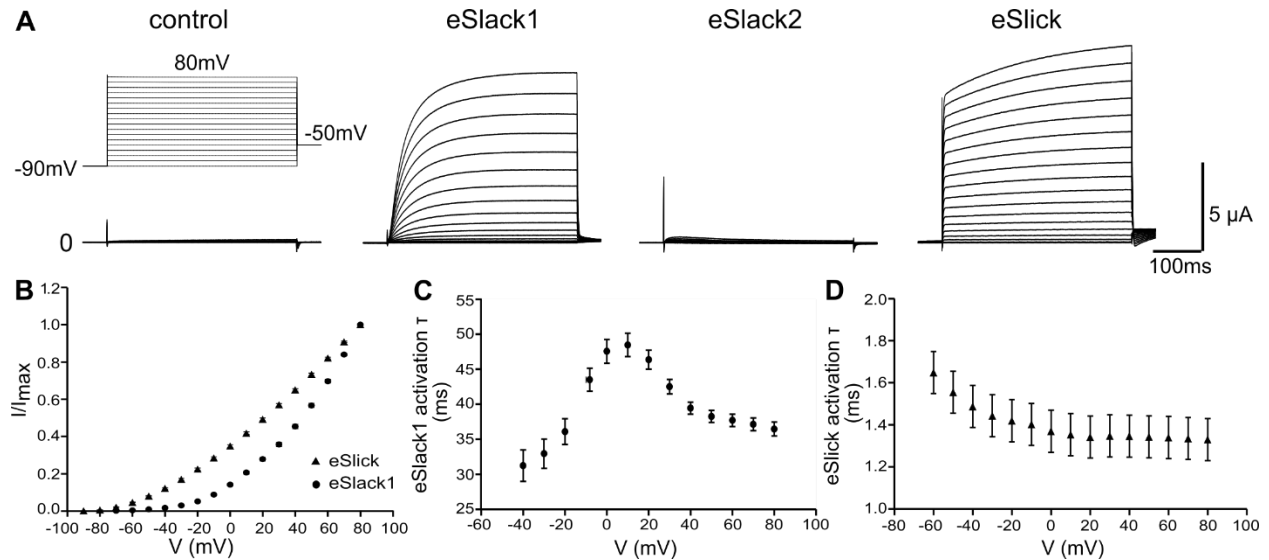

208

**Fig. 6. Whole cell recordings of *X. laevis* oocytes expressing *E. virescens* K<sub>Na</sub> channels.** *A*: Whole cell currents recorded when oocytes were depolarized by 400 ms voltage steps ranging from -90 mV to +80 mV in 10 mV increments every 5 s from a holding potential of -90 mV. *B*: Current-voltage relationship of oocytes expressing eSlack1 (circle; n=13) and eSlick (triangle; n=10) channels. Current amplitude was measured as the mean amplitude during the last 30 ms of each pulse, and divided by the maximal current amplitude. *C-D*: Activation time constant ( $\tau$ ) of eSlack1 (*C*; n=13) and eSlick (*D*; n=10) currents were plotted as a function of membrane potential.

209

210 The activity of mammalian Slack and Slick channels are regulated by the intracellular  
211 levels of Na<sup>+</sup> and Cl<sup>-</sup>. We therefore examined the effects of elevated [Na<sup>+</sup>]<sub>i</sub> on the activity of  
212 eSlack1 and eSlick channels. Thomson et al. showed that filling low resistance microelectrodes  
213 with 2M NaCl would allow Na<sup>+</sup> to diffuse into the cell and thereby increase [Na<sup>+</sup>]<sub>i</sub> [35, 45]. We  
214 applied the same method to increase [Na<sup>+</sup>]<sub>i</sub> and measured the amplitude of currents when the cell  
215 was depolarized to +20 mV repetitively from -90 mV every 10 s. The peak amplitude of eSlack1  
216 and eSlick currents was higher than that of control cells immediately after impaling the cell,

217 suggesting that eSlack1 and eSlick have basal levels of activity even at intraocyte  $\text{Na}^+$   
218 concentrations of  $\sim 10$  mM [46] (Fig. 7A).

219         During a 9-min recording, the peak amplitude of both eSlack1 and eSlick at membrane  
220 potential of +20 mV was elevated with NaCl diffusing into the cell (Fig. 7A and C). To  
221 distinguish the role of  $\text{Na}^+$  and  $\text{Cl}^-$  in increasing current amplitude, we also used microelectrodes  
222 filled with 2M KCl and measured the peak amplitude of both eSlack1 and eSlick within 9 min.  
223 The currents of eSlack1 stayed constant with increased intracellular levels of KCl. In contrast,  
224 eSlick showed increased current magnitudes with KCl-filled electrodes (Fig. 7B and C). The  
225 peak current of control cells at +20 mV remained constant during 9-min loading of either 2M  
226 NaCl or KCl (Fig. 7). These results suggest that eSlack1 has an absolute requirement of  $\text{Na}^+$  to  
227 increase the channel's open probability, whereas, eSlick channels are more sensitive to  
228 intracellular  $\text{Cl}^-$  levels.

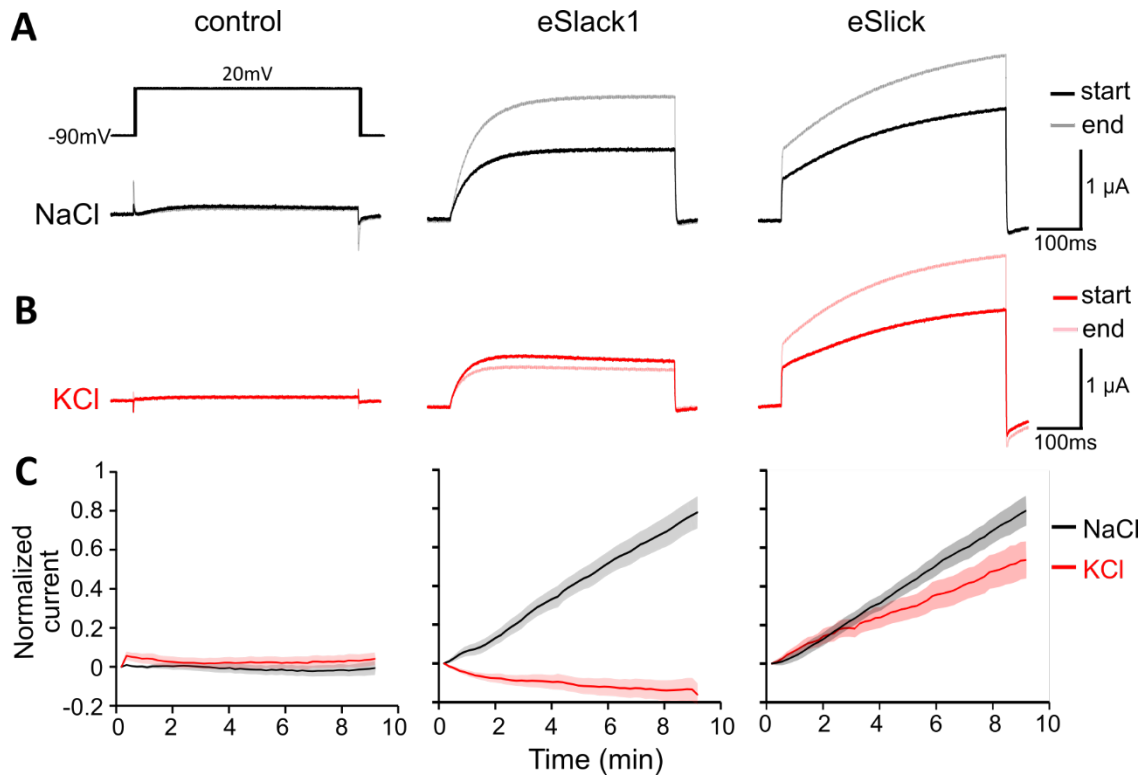

**Fig. 7. Whole cell currents of eSlack1 and eSlick with microelectrodes filled with 2M NaCl or KCl.**

Oocytes were depolarized by a 500 ms pulse to +20 mV from a holding potential of -90 mV every 10s. *A*: With both microelectrodes filled with 2M NaCl, whole cell currents recorded from control oocytes (left), oocytes expressing eSlack1 channels (middle), and oocytes expressing eSlick channels (right) immediately after impaling the cell (start; black) and after 9 min of loading (end; gray). *B*: Whole cell currents recorded from the three types of oocytes mentioned above immediately after impaling the cell (start; red) and 9 min after (end; pink), with both microelectrodes filled with 2M KCl solution. *C*: Current amplitudes were normalized to the current recorded at “start”, and taken the log (base 2). Normalized current amplitudes from control cells (left), cells expressing eSlack1 (middle) and cells expressing eSlick (right) were plotted against time with 2M NaCl (black) or KCl (red) loaded to the cell. Measurements from 8 cells in each group were analyzed. Standard error was shown as gray or pink shades.

229

## 230 Transcription levels of eSlick increase with EOD frequency

231 *E. virescens* has considerable animal-to-animal variability in EOD frequency (200-500

232 Hz) [8] (Fig. 1E). Previous studies in a closely related species *Sternopygus macrurus* have shown

233 that potassium channels in the EO are expressed in a gradient with EODf [21], this led us to

234 examine whether the mRNA levels of *eSlack1*, *eSlack2* and *eSlick* genes in the EO vary across

235 fish with different EOD frequencies. We extracted RNA from the EO of 10 fish with different

236 EOD frequencies (192 Hz, 206 Hz, 229 Hz, 250 Hz, 300 Hz, 333 Hz, 350 Hz, 380 Hz, 395 Hz,  
237 426 Hz) spanning most of the species' natural range, and measured the transcription levels of the  
238 three  $K_{Na}$  channel genes with real-time PCR. We found that only the transcription level of eSlick  
239 was positively correlated with EOD frequency, whereas eSlack1 and eSlack2 were not  
240 transcribed in a gradient with EOD frequency (Fig. 8A and Fig. 9A-C)). We also divided the fish  
241 into two groups with high ( $\geq 300$  Hz) and low ( $< 300$  Hz) EOD frequencies, and compared the  
242 mean transcription level of the three  $K_{Na}$  channel genes between the two groups. Significant  
243 differences between fish with high and low EOD frequencies was only noted in the transcription  
244 level of eSlick (high frequency:  $n = 5$ ,  $3.52$  (Mean)  $\pm 0.58$  (SEM); low frequency:  $n = 5$ ,  $1.94$   
245 (Mean)  $\pm 0.28$  (SEM); Student's t-test,  $p = 0.039$ ), but not eSlack1 (high frequency:  $n=5$ ,  
246  $1.51$ (Mean)  $\pm 0.40$  (SEM); low frequency:  $n=5$ ,  $0.96$  (Mean)  $\pm 0.23$  (SEM); Student's t-test,  $p =$   
247  $0.258$ ) and eSlack2 (high frequency:  $n=5$ ,  $2.31$ (Mean)  $\pm 0.31$ (SEM); low frequency:  $n=5$ ,  $1.83$   
248 (Mean)  $\pm 0.95$  (SEM); Student's t-test,  $p = 0.647$ ) (Fig. 8C).

#### 249 **Transcription levels of $Na_v1.4a$ , Kir6.2 and $Na^+/K^+$ ATPase increase with EOD frequency**

250 In addition to the  $Na^+$ -activated  $K^+$  current observed in electrocytes, whole cell  
251 recordings of endogenous currents in electrocytes also indicate the existence of an inwardly  
252 rectifying  $K^+$  (Kir) current and a voltage-gated  $Na^+$  ( $Na_v$ ) current [14]. The firing frequency of  
253 electrocytes is maintained by the coordination between ion channels involved in generating APs  
254 and the  $Na^+/K^+$  ATPases, which are responsible for restoring the ionic gradients after each AP.  
255 The  $Na_v$  channels in the EO of *E. virescens* are encoded by a pair of duplicated genes,  $Na_v1.4a$   
256 and  $Na_v1.4b$ , which are orthologs of the mammalian muscle-specific  $Na_v1.4$  gene [26]. The Kir  
257 channels are ATP sensitive potassium ( $K_{ATP}$ ) channels encoded by the KCNJ11 gene  
258 (unpublished data). In reverse transcription PCR, we noted that  $Na_v1.4b$  and Kir6.2 are expressed

259 in both muscle and EO, whereas, Nav1.4a and the  $\alpha$ -subunit of Na<sup>+</sup>/K<sup>+</sup> ATPases are dominantly  
260 expressed in the EO (data not shown). We reasoned that EOD frequency might also correlated  
261 with expression levels of these ion channels and Na<sup>+</sup>/K<sup>+</sup> ATPases.

262 With real-time PCR, we measured the mRNA levels of these genes from the EOs of the  
263 same 10 fish used in the previous experiment. Results showed that the transcription levels of  
264 Nav1.4a, Kir6.2 and Na<sup>+</sup>/K<sup>+</sup> ATPase increased exponentially with EOD frequency (Fig. 8B1, B3  
265 and B4, and Fig. 9D, F and G). No correlation between the transcription level of Nav1.4b and  
266 EOD frequency was detected (Fig. 8B2 and Fig. 9E). When comparing the mean transcription  
267 level of genes between the two groups of fish with high and low EOD frequencies, significant  
268 difference was detected in Nav1.4a (high frequency: n=5, 3.89 (Mean)  $\pm$  0.72 (SEM); low  
269 frequency: n=5, 1.38 (Mean)  $\pm$  0.17 (SEM); Student's t-test,  $p = 0.009$ ), Kir6.2 (high frequency:  
270 n=5, 3.18 (Mean)  $\pm$  0.55 (SEM); low frequency: n=5, 1.16 (Mean)  $\pm$  0.13 (SEM); Student's t-  
271 test,  $p = 0.007$ ) and Na<sup>+</sup>/K<sup>+</sup>-ATPase (high frequency: n=3, 6.84 (Mean)  $\pm$  1.28 (SEM); low  
272 frequency: n=5, 1.57 (Mean)  $\pm$  0.61 (SEM); Student's t-test,  $p = 0.005$ ), but not Nav1.4b (high  
273 frequency: n=5, 1.28 (Mean)  $\pm$  0.19 (SEM); low frequency: n=5, 1.32 (Mean)  $\pm$  0.19 (SEM);  
274 Student's t-test,  $p = 0.887$ ) (Fig. 8C).

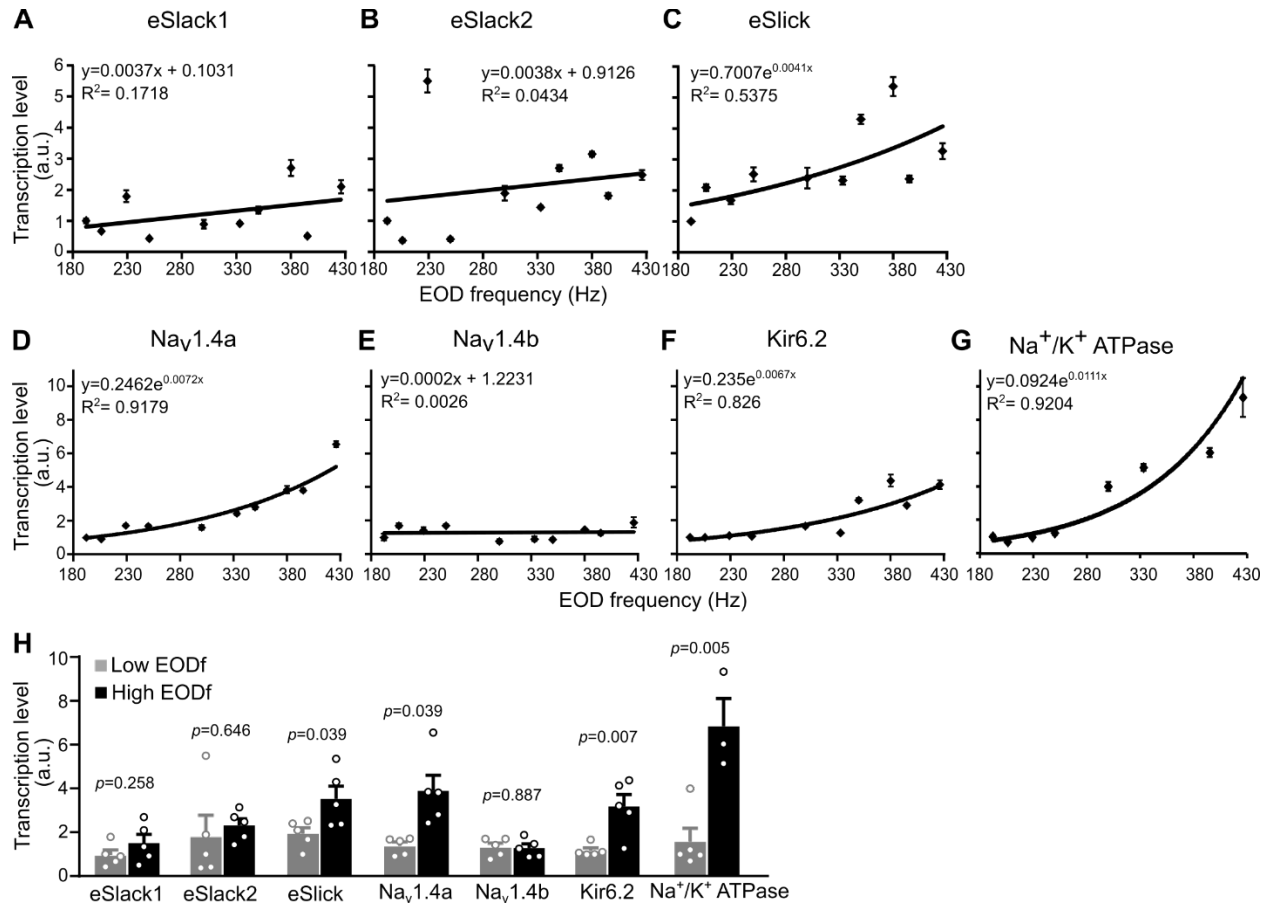

275

**Fig. 8. Real-time PCR quantification of ion channel genes in EOs from *E. virescens* with different EOD frequencies.** *A-B*: The normalized transcription levels of target genes were plotted against EOD frequency. *A*: The transcription level of eSlack1 (A1) and eSlack2 (A2) in the EO do not correlate with EOD frequency. The transcription level of eSlick increases with EOD frequency (A3). *B*: The transcription levels of Nav1.4a (B1), Kir6.2 (B3) and Na<sup>+</sup>/K<sup>+</sup> ATPase (B4) in EO from fish with different EOD frequencies can be fitted into an exponential curve. There is no correlation between the normalized amounts of Nav1.4b (B2) transcripts in EO and EOD frequency. *C*: Comparison of the mean transcription levels of genes between low (< 300 Hz) and high (> 300 Hz) frequency EOs. The average amounts of eSlick, Nav1.4a, Kir6.2 and Na<sup>+</sup>/K<sup>+</sup> ATPase in high frequency EOs are higher than that in low frequency EOs. There is no significant difference in the mean transcription levels of eSlack1, eSlack2 and Nav1.4b between high and low frequency EOs..

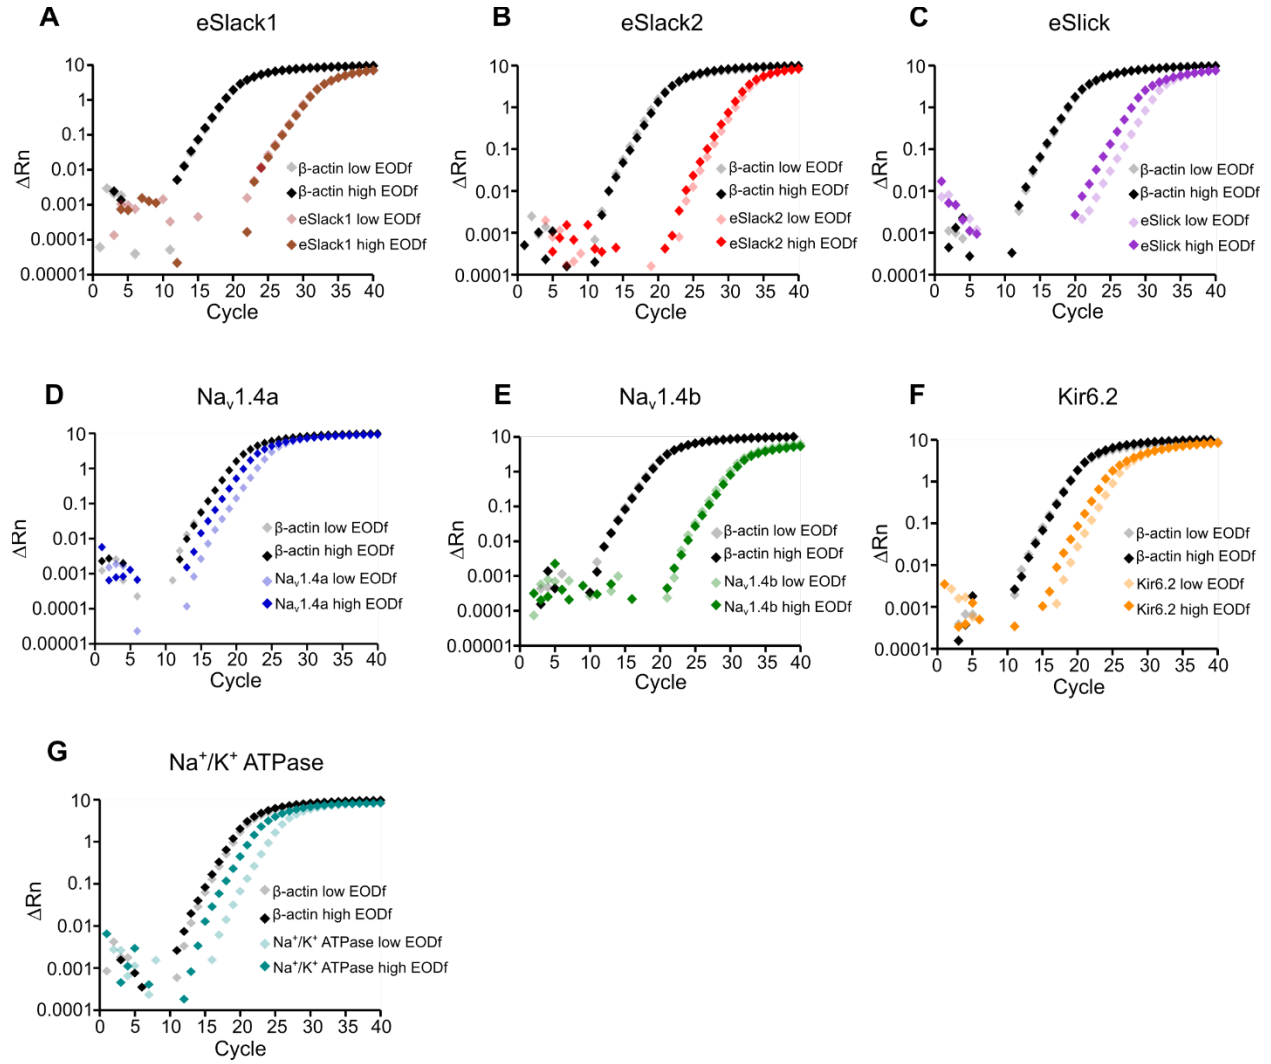

276

**Fig. 9. Amplification of the target genes and endogenous control  $\beta$ -actin from EO cDNA of a fish with low EODf and a fish with high EODf.** The amplifications of  $\beta$ -actin, eSlack1 (A), eSlack2 (B), and  $\text{Na}_v1.4b$  (E) from EO cDNAs of fish with high and low EODf look identical. eSlick (C),  $\text{Na}_v1.4a$  (D), Kir6.2 (F), and  $\text{Na}^+/\text{K}^+$  ATPase (G) started amplifying and reached the amplification plateau phase earlier when using EO cDNAs from a fish with high EODf than EO cDNAs from a fish with low EODf.

277 **Frequency-dependent scaling of multiple ionic conductances is necessary to maintain the**  
278 **integrity of simulated AP trains as EOD frequency increases.**

279 The frequency-dependent scaling of Nav1.4a, eSlick, and Kir6.2 mRNA levels led us to  
280 evaluate whether scaling the conductances associated with these mRNA transcripts is necessary  
281 to maintain electrocyte AP firing as AP frequency increases. In five model cells, we ran a series  
282 of simulations where AP frequencies from 150 Hz to 425 Hz in 25 Hz increments. (Fig. 10a,  
283 10b). The ionic conductances of the five model cells were 1) all conductances fixed across AP  
284 frequencies, 2) only  $\bar{g}_{Na}$  scaled exponentially with AP frequency, 3) both  $\bar{g}_{Na}$  and  $\bar{g}_R$  scaled  
285 with AP frequency, 4) both  $\bar{g}_{Na}$  and  $\bar{g}_{KNa}$  scaled with AP frequency and 5) a model where  $\bar{g}_{Na}$ ,  
286  $\bar{g}_{KNa}$ , and  $\bar{g}_R$  scaled with AP frequency. For model cells where ionic conductances were scaled,  
287 we scaled those conductances according to the best fit lines from the previous RNA expression  
288 data. In the first model where all conductances were fixed, AP amplitude decreased markedly at  
289 higher AP frequencies, a result of reduced membrane potential at peak, and incomplete  
290 repolarization before the subsequent AP (Fig. 10a,b,g-i). For the second and third models where  
291 only  $\bar{g}_{Na}$ , or where  $\bar{g}_{Na}$ , and  $\bar{g}_R$  scaled with AP frequency, AP amplitudes were relatively stable  
292 through intermediate AP frequencies then declined precipitously at higher AP frequencies,  
293 largely because of near-failures to repolarize in the interspike interval (Fig. 10c,d,g-i). Allowing  
294  $\bar{g}_{Na}$  and  $\bar{g}_{KNa}$  to scale with AP frequency resulted in highly stable AP amplitudes across all AP  
295 frequencies (Figure 10e,g-i) and this stability was improved when all three conductances ( $\bar{g}_{Na}$ ,  
296  $\bar{g}_{KNa}$ , and  $\bar{g}_R$ ) scaled with AP frequency (Fig. 10f-j). The improvements in AP consistency seen  
297 in the last two models was primarily a result of improved repolarization during the interspike  
298 interval (Fig. 10i), with the model producing the most consistent AP amplitudes being the one  
299 where all three conductances scaled with AP frequency (Figure 10j). These outcomes suggest



300 that scaling these ionic conductances in a frequency-dependent manner consistent with our  
301 mRNA expression data is necessary to maintain AP waveform integrity as AP frequency  
302 increases.

303 **Demand for Na<sup>+</sup> transport increases exponentially as EOD frequency increases.**

304 Our simulations also suggest that an exponential scaling of Na<sup>+</sup>,K<sup>+</sup>-ATPase expression is  
305 necessary as EOD frequency increases. We calculated the required rate of Na<sup>+</sup> extrusion to  
306 restore Na<sup>+</sup> gradients (Na<sup>+</sup> clear rate) for all five model cells across AP frequencies from 150 Hz  
307 to 425 Hz. Na<sup>+</sup> clear rate was computed as the pumping rate necessary to return all Na<sup>+</sup> that  
308 entered the cell during the AP to the extracellular space before the initiation of the next AP. The  
309 Na<sup>+</sup> clear rate increased in a linear fashion (equation shown in figure) for the model cell where  
310 all conductances were fixed. For the other four cells in which ionic conductances varied with AP  
311 frequency, Na<sup>+</sup> clear rates increased exponentially. The greatest increases in Na<sup>+</sup> clear rate across  
312 AP frequencies occurred in the last two model cells where where  $\bar{g}_{Na}$  and  $\bar{g}_{KNa}$ , or  $\bar{g}_{Na}$ ,  $\bar{g}_{KNa}$ ,  
313 and  $\bar{g}_R$  scaled with AP frequency, thereby producing the greatest consistency in AP amplitudes  
314 (Fig. 10j,k).

Coregulation of ionic conductances - 26

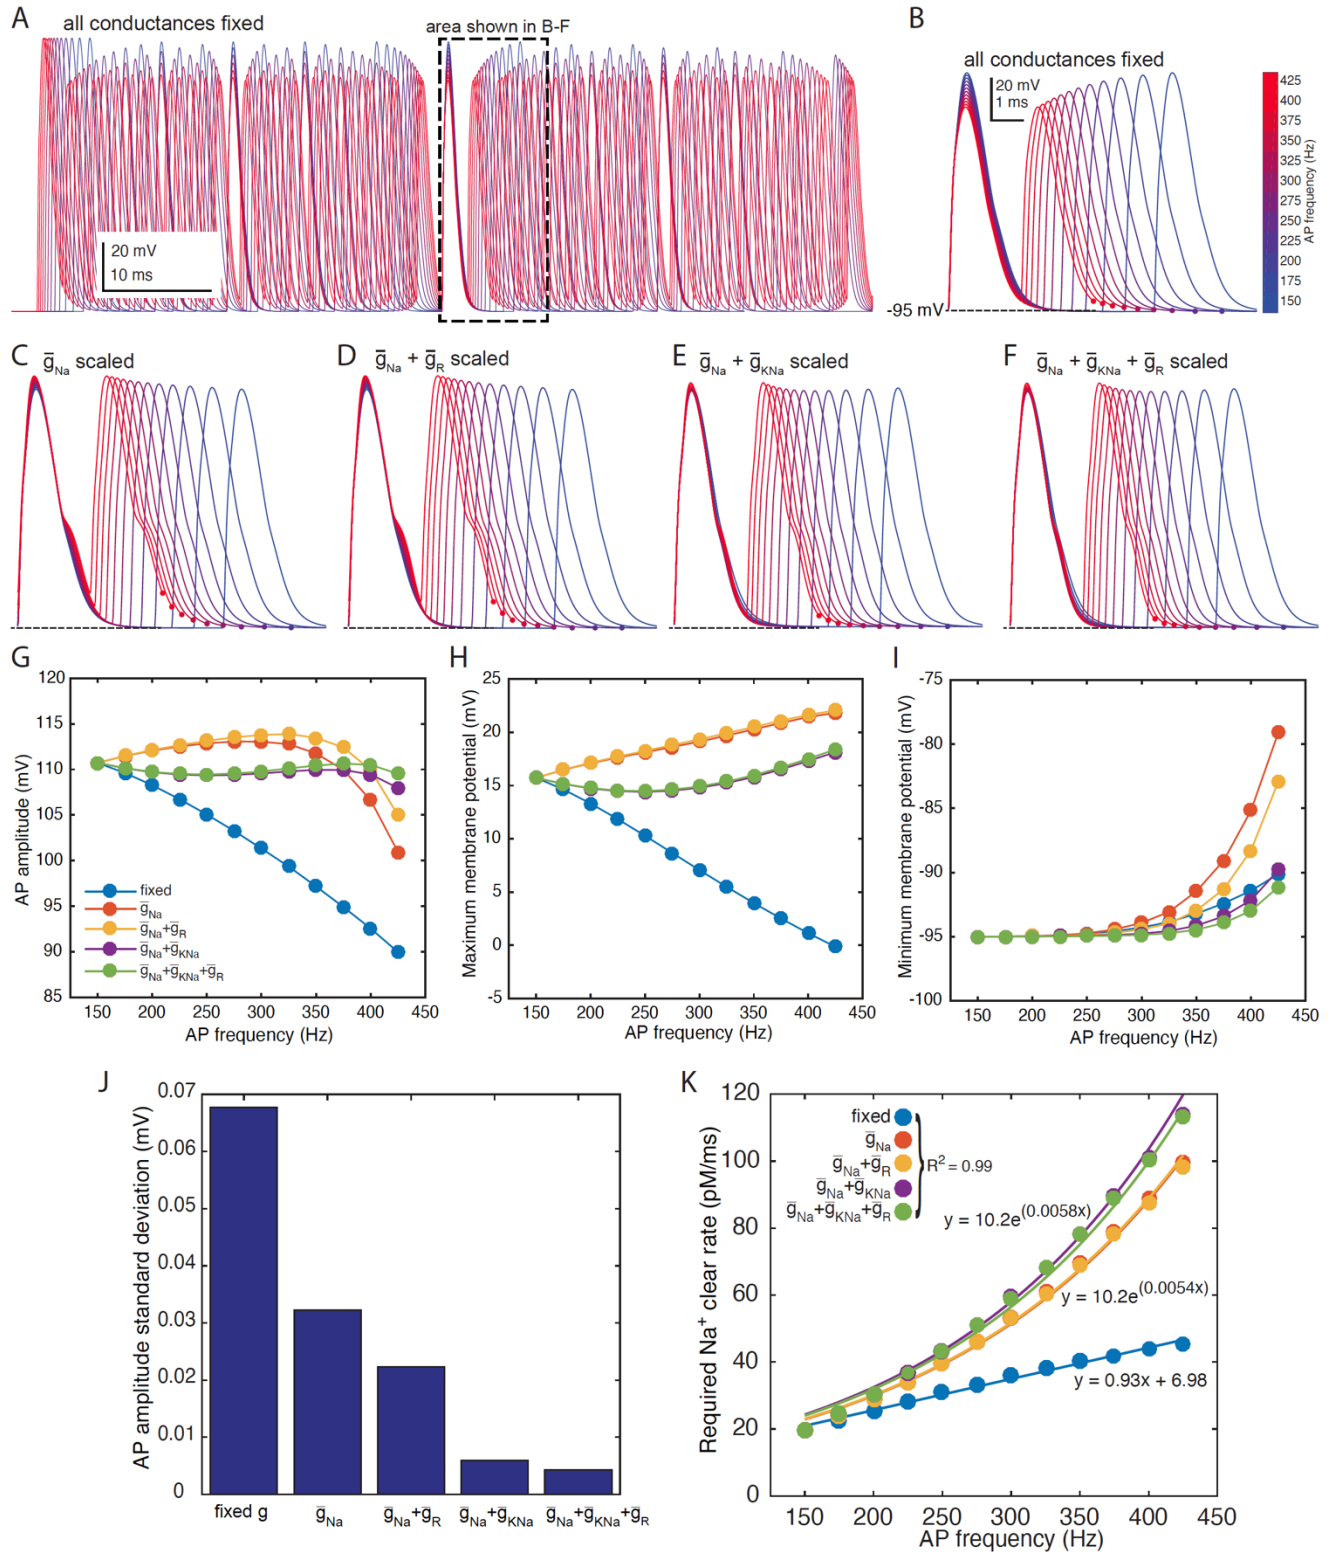

Fig. 10: (Caption next page.)

316

**Fig. 10. Computational simulations of electrocyte APs across AP frequencies in model electrocytes with and without scaled ionic conductances.** (A) Superimposed trains of APs at frequencies from 150 Hz (blue) to 425 Hz (red) in 25 Hz steps, where all ionic conductances were held constant across AP frequencies. The area within the dashed box is shown on expanded scale in *B* through *F*. (B) Two sequential action potentials within each of the AP trains shown in *A*. Firing frequency is indicated according to the color map at right from 150 Hz (blue) to 425 Hz (red). Small color-coded circles indicate where the next AP in the train initiated (subsequent APs not shown for clarity). All ionic conductances were constant across AP frequencies. At higher AP frequencies, peak membrane potential during the AP decreased and AP repolarization was increasingly incomplete during the interspike interval. (C) Sequential APs represented as in *B*, where  $\bar{g}_{Na}$  scaled exponentially with AP frequency according to the scaling equation  $\bar{g}_{Na} = 2300(0.264e^{0.0057x}) + 700$ . (D) Sequential APs where  $\bar{g}_{Na}$  scaled with AP frequency as in *C*, and  $\bar{g}_R$  scaled with AP frequency according to the equation  $\bar{g}_R = 100(0.235e^{0.0067x})$ . (E) Sequential APs where  $\bar{g}_{Na}$  scaled with AP frequency as in *C* and  $\bar{g}_{KNa}$  scaled with AP frequency according to the equation  $\bar{g}_{KNa} = 2000(0.672e^{0.0041x})$ . (F) Sequential APs where  $\bar{g}_{Na}$  and  $\bar{g}_{KNa}$  scaled with AP frequency as in *E* and  $\bar{g}_R$  scaled with AP frequency as in *D*. (G) AP amplitude, measured peak-to-trough for five model cells across AP frequencies from 150 Hz to 425 Hz. Ionic conductances were fixed for all frequencies or various combinations of ionic conductances were varied in a frequency-dependent manner as indicated in the legend. AP amplitude decreased significantly at higher frequencies where conductances were fixed. Consistency of AP amplitudes improved as conductances were scaled with frequency, with the greatest consistency across frequencies produced by the model cell where  $\bar{g}_{Na}$ ,  $\bar{g}_{KNa}$ , and  $\bar{g}_R$  were all scaled with AP frequency. (H) Peak membrane potential during the AP for the same five model cells in *G*. Ionic conductances were fixed for all frequencies or various combinations of ionic conductances were varied in a frequency-dependent manner as indicated in the legend. Peak membrane potential decreased significantly at higher frequencies where conductances were fixed. Consistency of peak AP potential improved as conductances were scaled with frequency, with the greatest consistency across frequencies produced by the model cell where  $\bar{g}_{Na}$ ,  $\bar{g}_{KNa}$ , and  $\bar{g}_R$  were all scaled with AP frequency. (I) Minimum membrane potential during the interspike interval for the same five model cells in *G*. Ionic conductances were fixed for all frequencies or various combinations of ionic conductances were varied in a frequency-dependent manner as indicated in the legend. Repolarization was most complete at higher frequencies for the model cell where  $\bar{g}_{Na}$ ,  $\bar{g}_{KNa}$ , and  $\bar{g}_R$  were all scaled with AP frequency. (J) Standard deviation of AP amplitude (as measured in *G*) across all AP frequencies for model cells where all ionic conductances were fixed, or scaled with frequency. The model cell with fixed conductances exhibited the largest variability in AP amplitude, while the model cell where  $\bar{g}_{Na}$ ,  $\bar{g}_{KNa}$ , and  $\bar{g}_R$  were all scaled with AP frequency showed the least variability in AP amplitude. (K) Required rate of  $Na^+$  extrusion to restore  $Na^+$  gradients ( $Na^+$  clear rate) for five model cells across AP frequencies from 150 Hz to 425 Hz.  $Na^+$  clear rate was computed as pM of  $Na^+$  entering the cell during the AP divided by the interspike interval. Ionic conductances were fixed for all frequencies or various combinations of ionic conductances were varied in a frequency-dependent manner as indicated in the legend. Filled circles are individual data points. Solid lines indicate least-squares regression fits. Goodness of fit, as measured by  $R^2$  was equal across all model cells. The  $Na^+$  clear rate increased in a linear fashion (equation shown in figure) for the model cell where all conductances were fixed. For cells where ionic conductances were varied with AP frequency,  $Na^+$  clear rates increased exponentially according to the equations shown in the figure. The exponential equations were indistinguishable within rounding for the cells where  $\bar{g}_{Na}$ , or  $\bar{g}_{Na}$  and  $\bar{g}_R$ , were varied as where the equations for cells where  $\bar{g}_{Na}$  and  $\bar{g}_{KNa}$ , or where  $\bar{g}_{Na}$ ,  $\bar{g}_{KNa}$ , and  $\bar{g}_R$ , were scaled.

317 **DISCUSSION**

318 *E. virescens* electrocytes face a challenge that is unique among excitable cells:  
319 maintaining unremitting firing rates of 200 to 600 Hz throughout the lifespan while producing  
320 microAmp-scale ionic currents during each AP. How can these cells maintain these extremely  
321 high firing rates and satisfy equally extreme demands for the rapid restoration of ion gradients  
322 between APs? Our findings here provide several key insights about the ionic mechanisms that  
323 make these feats possible as well as their metabolic consequences. We found that electrocytes  
324 fulfill the fast-spiking requirement by exponentially increasing expression levels of multiple ion  
325 channels, including a novel rapidly-activating  $K_{Na}$  channel isoform. Scaling expression levels of  
326 these channels to match firing rates is necessary for maintaining the integrity of the AP  
327 waveform as firing rates increase, but this comes at the cost of exponentially increasing demand  
328 for charge translocation by the  $Na^+,K^+$ -ATPase. Consistent with this conclusion we also found  
329 that  $Na^+,K^+$ -ATPase mRNA expression levels and electrocyte AP metabolic demand increase  
330 exponentially at higher firing rates.

331 We measured the mRNA levels of  $Nav1.4a$ ,  $Nav1.4b$ ,  $eSlack1$ ,  $eSlack2$ ,  $eSlick$ ,  $Kir6.2$   
332 and  $Na^+/K^+$  ATPase in EO from *E. virescens* with different EODf and found that transcription  
333 levels of  $Nav1.4a$ ,  $eSlick$ ,  $Kir6.2$  and  $Na^+/K^+$  ATPase are positively and exponentially correlated  
334 to EODf whereas levels of the other transcripts were not. Among the four genes that were  
335 correlated with EODf,  $Nav1.4a$  and  $Na^+/K^+$  ATPase are predominantly expressed in EO and  
336  $eSlick$  is expressed exclusively in EO, whereas  $Kir6.2$  showed similar transcription levels in both  
337 muscle and EO, as was also the case for the genes that did not correlate with EODf ( $Nav1.4b$ ,  
338  $eSlack1$ , and  $eSlack2$ ). Importantly, mRNA levels do not always predict its protein abundance,  
339 and we have not directly determined whether the abundance of corresponding proteins in

340 electrocytes also correlates with EODf due to the lack of specific antibodies targeting most of the  
341 ion channels in electrocytes. However, our computational simulations strongly support the  
342 conclusion that expression of channel proteins in the cell membrane, in accordance with our  
343 observed mRNA expression levels, is required for the maintenance of AP waveform integrity  
344 across firing frequencies.

### 345 **Diverse roles of specific ionic conductances for fast-spiking in electrocytes**

346         Given the faster activation kinetics for eSlick compared to eSlack1 and eSlack2, the  
347 correlation of eSlick with EODf is consistent with the briefer APs required as EODf increases.  
348 Higher expression of Na<sup>+</sup>/K<sup>+</sup> ATPases at higher EODfs also is easily understood for higher  
349 frequency EODs, as increased rates of AP generation will require more rapid restoration of ionic  
350 gradients following each AP. Faster K<sup>+</sup> channels are required to achieve fast-spiking. However,  
351 they will also increase the overlap between Na<sup>+</sup> and K<sup>+</sup> currents, further magnifying the energetic  
352 costs of AP generation. If minimizing energy consumption is one constraint governing the types  
353 of ion channels expressed in neurons [47], neurons with faster K<sup>+</sup> channels should also express  
354 Na<sup>+</sup> channels with a faster inactivation speed in order to reduce the overlap between Na<sup>+</sup> and K<sup>+</sup>  
355 currents. We have not yet determined the biophysical properties of Nav1.4a and Nav1.4b in this  
356 system, but Nav1.4a channels in weakly electric fish have numerous amino acid substitutions in  
357 regions associated with activation and inactivation [48].

358         The functional significance of scaling Kir6.2 expression levels with EODf is less clear.  
359 These channels are expressed at similar levels in EO and skeletal muscle unlike the other  
360 transcripts that scaled with EODf, and our computational simulations suggest that scaling Kir6.2  
361 levels has only a minor role in maintaining integrity of the electrocyte AP waveform at high

362 frequencies. One possibility is that Kir6.2 conductances are instead more important for  
363 responding to the metabolic state of the electrocyte. In neural, cardiac, and endocrine systems,  
364 Kir6.2 forms functional complexes with a sulphonylurea receptor (e.g. SUR1) belonging to the  
365 ATP-binding cassette (ABC) superfamily [49, 50]. These Kir6.2-SUR1 complexes in other  
366 systems are inhibited by physiological levels of ATP, increasing the channel's open probability  
367 as intracellular concentrations of ATP fall and ultimately preventing AP initiation [51, 52].

368         The relationship between ATP availability and activity of the Kir6.2-SUR1 complex in  
369 electrocytes requires further study to determine its precise role in electrocyte function. The Na<sup>+</sup>  
370 influx during each electrocyte AP exceeds 10 μA, requiring approximately  $2 \times 10^{10}$  ATP  
371 molecules for the Na<sup>+</sup>,K<sup>+</sup> ATPases to restore the ionic gradients after each AP [11],  
372 approximately 100 times higher than that estimated for mammalian neurons [11, 53, 54]. The  
373 significant metabolic expense of a single AP, coupled with very high firing frequencies  
374 potentially exposes electrocytes to frequent changes in metabolic status. One appealing  
375 hypothesis is that these K<sub>ATP</sub> channel complexes may form an endogenous protective system to  
376 stabilize the cell's bioelectrical properties under metabolic stress as is the case in cardiac  
377 myocytes [52]. Under this scenario higher levels of Kir6.2 would be required in higher-  
378 frequency electrocytes to overcome the larger Na<sup>+</sup> conductances necessary for higher frequency  
379 APs.

380         In an earlier study we characterized the electrophysiological properties of a K<sub>Na</sub>  
381 conductance in *E. virescens* electrocytes without distinguishing multiple channel isoforms [14].  
382 In the present study, we discovered the presence of three K<sub>Na</sub> channel subunits expressed in  
383 electrocytes, eSlack1, eSlack2 and eSlick. Among these eSlack1 and eSlack2 closely resemble  
384 mammalian Slack channels, whereas eSlick appears to be a novel K<sub>Na</sub> isoform with significant

385 sequence divergence from mammalian Slick including the loss of a conserved ATP binding  
386 motif. Mammalian Slick channels contain an ATP binding motif in the C-terminal tail and can be  
387 directly inhibited by intracellular ATP [25]. Whether eSlick is regulated by ATP remains a  
388 question for future research, but the absence of a conserved ATP binding motif in eSlick  
389 suggests that it is not.

390         It is noteworthy that *E. virescens* electrocytes terminate their APs with  $K_{Na}$  channels  
391 whereas in all other electric fish where electrophysiology data are available and where EOD  
392 frequencies are much lower, electrocyte APs are terminated by  $K_v$  channels [14-17]. Fast-  
393 spiking vertebrate cortical neurons maintain high firing frequencies and reduce the metabolic  
394 cost of AP generation to near the theoretical minimum by tuning the kinetics of  $Na^+$  and  $K^+$   
395 conductances to achieve rapid  $Na^+$  current inactivation and delayed onset of a rapidly-activating  
396  $K^+$  conductance [55]. Similar mechanisms support high firing frequencies in brainstem auditory  
397 neurons [56]. In both cases, maintaining fast firing rates depends on voltage-gated  $K^+$   
398 conductances from the  $K_v3$  family of  $K^+$  channels. In computational simulations from earlier  
399 work, however, we found evidence that  $K_{Na}$  channels were necessary to support high-frequency  
400 APs in *E. virescens* electrocytes, while  $K_v3.1$  channels were insufficient to maintain high firing  
401 frequencies [14].

402         Similar to mammalian  $K_{Na}$  channels, the opening of eSlick1 channels requires elevations  
403 of intracellular  $Na^+$ , whereas, eSlick channels' opening appears to be more dependent on  
404 intracellular levels of  $Cl^-$ . These characteristics offer  $K_{Na}$  channels several advantages over  $K_v$   
405 channels in cells with high firing rates. The accumulation of intracellular  $Na^+$  with high  
406 frequency stimulation may enhance activation of  $K_{Na}$  channels which could in turn serve as a  
407 negative feedback mechanism for the increased activity of  $Na^+$  channels. Additionally,  $K_{Na}$

408 channels may play a protective role against the inhibition of Na<sup>+</sup>/K<sup>+</sup> ATPases under hypoxic  
409 conditions. The natural habitats of *E. virescens* include regions of low-oxygen waters and these  
410 fish are reported to have higher tolerance to hypoxic stress [57, 58]. Hypoxia-induced inhibition  
411 of Na<sup>+</sup>/K<sup>+</sup> ATPases results in the increase of intracellular Na<sup>+</sup> concentrations, which might  
412 enhance K<sub>Na</sub> channel activity to increase the cell's ability to react to metabolic stress arising  
413 from hypoxia or dietary energy shortfalls [59].

#### 414 **Multiple K<sub>Na</sub> channel subunits with distinctive roles**

415 Functional potassium channels are tetramers of four subunits, and channels can consist of  
416 homotetramers or heterotetramers. Heterotetrameric K<sup>+</sup> channels have functional properties that  
417 are typically intermediate between the properties of homomeric channels for each subunit. In the  
418 present study, eSlick currents were much faster than eSlack currents and therefore better suited  
419 for higher frequency electrocytes. The positive correlation of eSlick expression with EODf  
420 suggests two possibilities. One is that the ratio of eSlick homotetrameric channels to eSlack1  
421 homotetrameric channels increases as EODf increases. A second possibility is that the ratio of  
422 eSlick to eSlack subunits within heterotetramers increases with EOD frequency. All three K<sub>Na</sub>  
423 channels in *E. virescens* electrocytes are expressed on the cells' anterior region, suggesting the  
424 possibility that they form heterotetrameric K<sub>Na</sub> channels. Additionally, the failure of eSlack2  
425 expressed alone to produce functional K<sub>Na</sub> channels strongly suggests that this subunit occurs  
426 only within heterotetramers formed with eSlack1 and/or eSlick.

427 In mammalian systems, RNA alternative splicing gives rise to multiple Slack variant  
428 transcripts, Slack-A, Slack-B and Slack-M, which are regulated by alternative promoters and  
429 differ in the residues in their N-terminus [30]. The N-terminus of Slack-B is necessary for the



430 trafficking of Slick subunits into the plasma membrane and they can form heterotetrameric  $K_{Na}$   
431 channels[60]. eSlack2 and eSlick share similar N-terminal sequences with rat Slack-A and Slick.  
432 eSlack1 have a unique N-terminus, which is not identical to the N-terminus of any known  
433 mammalian Slack and Slick subunits. Heterogeneous expression of *E. virescens*  $K_{Na}$  channels in  
434 *X. laevis* oocytes showed that eSlack1 and eSlick can form functional homotetrameric  $K_{Na}$   
435 channels and, although eSlack2 can be successfully trafficked into the plasma membrane, it  
436 could not conduct currents, which is likely due to the shorter C-terminal tail. Future biochemical  
437 studies with immunoprecipitation are necessary to examine the interactions among the three *E.*  
438 *virescens*  $K_{Na}$  channel subunits and the possibility to form heterotetrameric ion channels.

#### 439 **Coregulation of ionic conductance densities as a general mechanism for fast-spiking cells**

440 Matching ion channel expression levels to EODf occurs also in the closely related  
441 *Sternopygus macrucus*, a weakly electric fish with lower range of EODfs (~50-200 Hz). Here,  
442 the transcription levels of two Kv channel subunits in EO (Kv1.1a and Kv1.2b) are correlated  
443 with EODf [61] and one  $Na_v$  subunit expressed in EO ( $Na_v$  1.4b) is also correlated with EODf  
444 [62, 63]. Interestingly, in these cases the relationships between EODf and channel expression  
445 levels were linear, rather than exponential, suggesting the possibility that the much higher firing  
446 frequencies of *E. virescens* necessitated not only a shift to a very different molecular class of  
447 repolarizing  $K^+$  conductances, but also an escalation to exponential scaling of those  
448 conductances.

449 It is now well known that excitable cells modify the expression patterns of ionic  
450 conductances in order to maintain a particular functional state [64], but the cellular mechanisms  
451 that govern this process remain elusive [65-67]. A similarly intriguing question arises in the case

452 of electrocytes in the present study. Do electrocytes respond to a given firing rate determined by  
453 the pacemaker nucleus through a cell-autonomous mechanism that appropriately tunes the  
454 expression levels of the necessary ion channels, or does some cell-extrinsic, perhaps endocrine,  
455 mechanism regulate both pacemaker firing rate and electrocyte ion channel expression? The  
456 contrasts between our present results and previous findings in *S. macrurus* highlight that  
457 whatever mechanisms govern the scaling of ionic conductances in electrocytes, these  
458 mechanisms are both surprisingly general (operating on different classes of ion channels and  
459 with different scaling rules across taxa) and also very specific (targeting only specific ionic  
460 conductance within the electrocyte, and assigning a specific scaling factor to each conductance).  
461 An interesting question raised by the present findings is whether ionic conductance densities in  
462 fast-spiking central neurons are actively tuned when their prevailing firing frequencies change  
463 during development or in an experience-dependent manner. Recent reports of developmental  
464 increases in metabolic efficiency for fast-spiking cortical neurons [55] suggest this may be the  
465 case.

466         Understanding the mechanisms regulating of ion channel expression levels as firing rates  
467 change is important not only in the context of electric sensory and communication signals in fish,  
468 but also for understanding how the performance of fast-spiking cells is tuned and energy-  
469 information tradeoffs are managed in other systems such as auditory processing networks, and  
470 neural systems more generally. This is especially true because in both cases a tradeoff between  
471 firing rates and metabolic cost appears to be a major force that shapes both the operational  
472 properties and the functional limits of these systems [68]. In some cases, fast spiking cells  
473 maintain the metabolic costs of AP generation near the theoretical minimum, even at very high  
474 firing rates [55], while in other cases the metabolic costs of AP generation increase exponentially

475 as firing rates increase [11]. Comparative analyses of these processes across different taxa and  
476 different systems of excitable cells is an important step toward finding and understanding general  
477 and potentially convergent mechanisms that maintain high-frequency activity in fast-spiking  
478 cells and the rules that govern energy-information tradeoffs in bioelectric signaling systems.

479

## MATERIALS AND METHODS

### 480 **Animals and tissue harvesting**

481 *E. virescens* (glass knifefish) were obtained from tropical fish importers (Gunpowder  
482 Aquatics, Wimauma, FL), and housed in tanks in a recirculating aquarium system at  $28 \pm 1^\circ\text{C}$   
483 with water conductivity 100-150  $\mu\text{S}/\text{cm}$ . They were kept under 12 hour light: 12 hour dark cycle  
484 and fed *ad libitum* with live blackworms. The EO tissue was harvested by cutting off  $\sim 2\text{cm}$   
485 section of the tail and removing the overlying skin. Skeletal muscle tissue was dissected from the  
486 hypaxial muscle after fish were euthanized by immersion in 2% eugenol solution in aquarium  
487 water.

488 All methods described were approved by the Institutional Animal Care and Use  
489 Committee of The University of Oklahoma and complied with the guidelines given in the Public  
490 Health Service Guide for the Care and Use of Laboratory Animals.

### 491 **EOD frequency measurements**

492 Fish were transferred to the EOD recording tank with two recording wires attached to the  
493 two opposite end walls and a ground wire located at one of the side walls. They were allowed to  
494 move freely while EODs were differentially amplified with a Cygnuys FLA-01 amplifier  
495 (Delaware Water Gap, PA) and EODf of the amplified signal was measured with a RadioShack  
496 digital multimeter set in frequency mode. To prevent the effects of temperature and water  
497 conductivity on the fish's EOD frequency, the recording tank was placed in the aquarium room  
498 and filled with water from the same aquarium system where the fish was kept. Representative  
499 EOD waveforms recorded from two fish are shown in Fig.1E.

500 **Molecular Biology**

501 Reagents

502 The pSP64 Poly(A) vector, ImProm-II<sup>TM</sup> Reverse Transcription System and GoTaq<sup>®</sup>  
503 DNA polymerase were purchased from Promega (Madison, WI). The RNA Clean &  
504 Concentrator<sup>TM</sup>-5 was purchased from Zymo Research (Irvine, CA). The SMARTer<sup>®</sup> RACE  
505 5'/3' Kit was purchased from Clontech Laboratories, Inc. (Mountain View, CA). All other  
506 molecular biology reagents were purchased from Thermo Fisher Scientific (Waltham, MA).

507 RNA and cDNA preparation

508 Tissues were homogenized using LabGEN 125 homogenizer (Cole-Parmer). Total RNA  
509 was extracted using TRIzol<sup>®</sup> reagent and purified using RNA Clean & Concentrator<sup>TM</sup>-5.  
510 Genomic DNA contamination was removed by incubating the total RNA with DNaseI at room  
511 temperature for at least 15 minutes. RNA quality was assessed by loading and running total RNA  
512 in a 1% agarose gel containing 0.5% bleach and SYBR<sup>®</sup> Green II RNA Gel Stain [69]. One  
513 microgram of EO total RNA was reverse transcribed to cDNA with oligo(dT)<sub>15</sub> primer using  
514 ImProm-II<sup>TM</sup> Reverse Transcription System. The concentration of RNA and cDNA was  
515 measured by Qubit fluorometer 2.0 (Thermo Fisher Scientific).

516 Cloning and sequencing of genes encoding *E. virescens* K<sub>Na</sub> channels

517 cDNAs of interest were amplified by polymerase chain reaction (PCR) and 5'/3' rapid  
518 amplification of cDNA ends (RACE). All PCR and RACE products were initially analyzed on  
519 1% agarose gels stained with SYBR<sup>®</sup> Safe DNA Gel Stain, purified and cloned into TOPO TA  
520 vector or pRACE vector. In each cloning, plasmids extracted from ten isolated individual

521 colonies were sequenced by the Biology Core Molecular Lab at University of Oklahoma.  
522 Sequence results were used as a query to search the rat protein database using the online NCBI  
523 blastx tool to determine the molecular identity of amplified products [70].

#### 524 eSlack1

525 A ~500-bp fragment of eSlack1 was amplified by nested PCRs using Platinum<sup>®</sup> Taq High  
526 Fidelity DNA Polymerase with two pairs of degenerate primers designed against the highly  
527 conserved regions of published nucleotide sequences of *Slack* in other species (external primer  
528 pair: forward 5'-ARAGYTTYACCTWYGCYKCCTTY-3' and reverse 5'- RYYTTYTSNBG  
529 YARMAGRTGGCA-3'; internal primer pair: forward 5'- AYAARAARTAYGGWGTRTGT  
530 HTG-3' and reverse 5'- GGMGAGCTSCCRATRTABGGMGA-3'). The thermocycler  
531 conditions were 94°C for 2 min, 30 cycles of 94°C for 30 sec, 55°C for 30 sec, and 68°C for 3  
532 min, followed by a final extension step of 68°C for 10 min. The missing 5' end of eSlack1 cDNA  
533 was amplified by the following reactions: 1) A ~1-kb fragment was amplified by a 5'RACE  
534 reaction with a Slack degenerate primer (5'-GGMGAGCTSCCRATRTABGGMGA-3') and an  
535 universal primer provided by the SMARTer<sup>®</sup> RACE 5'/3' Kit. 2) A ~500-bp fragment was  
536 amplified in a PCR with a forward degenerate primer (5'- GCCWTCBCAGCTSCTGGTGGT -  
537 3') targeting the signature sequence of the K<sup>+</sup> selectivity filter and an eSlack1 specific reverse  
538 primer (5'-GCAAAGTCCTTCACCGCCCA-3') designed from the partial cDNA fragment. 3) A  
539 5'RACE PCR was carried out with an eSlack1 reverse primer (5'- TCACCTGACTGTCTGCCT  
540 CACATGGAC -3') and the universal primer to amplify the start codon as well as the  
541 5'untranslated region (UTR). The missing 3' end of eSlack1 including the stop codon and 3'UTR  
542 was amplified by a 3'RACE reaction with an eSlack1 forward primer (5'- CTACCCGTCCACA

543 GCATCATCACTAGC-3') and the universal primer. Sequences of the five eSlack1 fragments  
544 were aligned into a single contig (Geneious software, Biomatters Ltd, Auckland NZ). The full-  
545 length cDNA of eSlack1 was amplified with a forward primer (5'- ATATATAAGCTTTCTT  
546 TATTACCGAAGGTGTCCCTCCG-3') derived from the 5'UTR and a reverse primer (5'-  
547 TATATATCTAGAGTTTCGGTTGATCAGGTCAGTTTAAAC-3') derived from the 3'UTR. It  
548 was cut at the HindIII and XbaI sites introduced in the primers and cloned into pSP64 Poly(A)  
549 vector. Sequence of the insertion was confirmed to match the five overlapping PCR products.  
550 eSlack1 cDNA contains 3495 nucleotides.

### 551 eSlack2

552 The presence of eSlack2 was noted when sequencing the TOPO TA vectors inserted with  
553 the ~500-bp PCR product amplified with a forward degenerate primer targeting the K<sup>+</sup> selectivity  
554 filter signature sequence and a reverse eSlack1 specific primer. Insert sequences from ten  
555 plasmids were aligned and assembled into two contigs using the Geneious software. The two  
556 contigs share 78.8% homology in nucleotide sequence, with residue differences dispersed along  
557 the entire region, and both of them share the highest homology with rat Slack (NCBI BLAST).  
558 We next performed 5' and 3' RACE reactions to amplify the missing 5' and 3' ends. A ~1.5-kb  
559 product was amplified in the 5'RACE reaction with a gene specific reverse primer (5'-  
560 GAGCTGACGCAGAGCACCACGTGTTT-3'), and a ~5 kb product was amplified in the  
561 3'RACE reaction with a gene specific forward primer (5'- GCGTACCCACTCTGCCATGTT  
562 CAACC-3'). Sequences of the three PCR products were aligned to a single contig using  
563 Geneious. Full length eSlack2 cDNA was amplified with a forward primer (5'-ATATATGT  
564 CGACCTTCTTTACAATGATGGGAC-3') targeting the 5'UTR and a reverse primer (5'-  
565 TATATAGGATCCCATTGGACAGTATGAATGAC-3') targeting the 3'UTR. It was cut at the

566 SalI and BamHI sites introduced to the primers and cloned into pSP64 Poly(A) vector. Sequence  
567 of the insert corresponded to the consensus sequence of the aligned contig. eSlack2 is composed  
568 of 3093 nucleotides.

### 569 eSlick

570 When amplifying the 3' end of eSlack2 with an eSlack2 specific forward primer (5'-  
571 TCTGGTGGTGGTGGACAAGGAGAGC-3') and the universal primer, we detected a ~2.5-kb  
572 fragment. The RACE PCR product was cloned and sequenced as described. Nucleotide sequence  
573 was then blasted against rat protein database in NCBI, and shown to share the highest homology  
574 with rat Slick but not Slack. Then a 5' RACE PCR was performed to amplify the missing 5' end  
575 of the *Slick* transcript using a gene specific reverse primer (5'-ACGTCCTTATCCACAGAT  
576 CCTCCTCGG-3'). A ~4-kb DNA fragment was amplified, cloned and sequenced. Sequences of  
577 the two DNA fragments were aligned to a single contig containing potential start codon at the 5'  
578 region and stop codon at the 3' end. Full-length eSlick cDNA was amplified with a forward  
579 primer (5'-ATATATGTCGACTTTAGAGGAACGCATACTTAGC-3') designed against the  
580 5'UTR and a reverse primer (5'-TATATAGGATCCTAAGTAGTCAGATCAGTAGGGC-3')  
581 designed against the 3'UTR. It was cut at the SalI and BamHI sites introduced in the primers and  
582 cloned into pSP64 Poly(A) vector. eSlick cDNA contains 3510 nucleotides.

### 583 Reverse transcription PCR analysis of gene expression in EO and muscle

584 To identify the expression patterns of target genes in EO and muscle, Reverse  
585 Transcription PCR was performed using GoTaq® DNA polymerase with one microliter EO or  
586 muscle cDNA. Genes of interest and their specific primers are listed in Table 1. Thermocycling  
587 conditions included 95°C for 2 min, 35 cycles of 95°C for 30 sec, 55°C for 30 sec, and 72°C for



588 1min or 2 min (depending on the size of amplicons), and a final extension at 72°C for 5min.  
589 After gel electrophoresis, PCR products were visualized using the Safe Imager™ 2.0 (Thermo  
590 Fisher Scientific). Gel images were taken with the same exposure time.

| Gene    | Primers<br>(F: forward; R: reverse)                           | Amplicon Size<br>(bp) |
|---------|---------------------------------------------------------------|-----------------------|
| β-actin | F 5'-GTATTGTCACTAACTGGG-3'<br>R 5'-CATAGCTTTTCTCCAGAG-3'      | 501                   |
| eSlack1 | F 5'-TGTCTTCCACCTACGAGTGC-3'<br>R 5'-CCTCTCTGATCGACGAAACA-3'  | 1157                  |
| eSlack2 | F 5'-GGGTCTGCAGATTCCTTC-3'<br>R 5'-CCTCTGATGACGAGAACACG-3'    | 1881                  |
| eSlick  | F 5'-ATACCCTGTTTCGGGATTGAC-3'<br>R 5'-TGTGAACGCAGCTCTTATCC-3' | 1845                  |

591

#### 592 Real-time PCR for mRNA quantitation in EO

593 One microgram of total RNA extracted from EOs from 11 adult *E. virescens* with EOD  
594 frequencies (192Hz, 202Hz, 206Hz, 229Hz, 250Hz, 300Hz, 333Hz, 350Hz, 380Hz, 395Hz,  
595 426Hz) spanning the species' natural range was reverse transcribed to cDNA with oligo(dT)<sub>15</sub>  
596 primer using ImProm-II™ Reverse Transcription System. cDNA was diluted to 20 ng/μl. Gene  
597 specific primers were designed using the GenScript online software to control the primer length  
598 ~20 bases, melting temperature (T<sub>m</sub>) in the range of 58-60°C, and amplicon size ~100 bp (Table  
599 2). Each reaction contained 100 ng cDNA, 25ul 2× Power SYBR® Green Master Mix, 200 nM of  
600 forward and reverse primer, and nuclease-free H<sub>2</sub>O to reach a total volume of 50 μl. Experiments  
601 were run in an Applied Biosystems 7500 Real-time PCR system using the default run method for  
602 Power SYBR® Green cDNA two step kit: hold at 95°C for 10 min and 40 cycles amplification  
603 (denature at 95°C for 15 sec, and anneal/extend at 60°C for 1min). Each sample has three  
604 technical replicates. The specificity of primers was assessed by both melt curve analysis and gel

605 electrophoresis of qPCR product. The expression level of all target genes were normalized to the  
 606 endogenous control  $\beta$ -actin. EO cDNA from fish with the lowest EOD frequency (192 Hz) was  
 607 used as the calibrator sample. Reactions without cDNA template were performed as negative  
 608 controls. All negative controls showed no amplification or amplification starting more than eight  
 609 cycles later than the reactions with cDNA template. In each experimental run, the standard curve  
 610 was generated using 500, 100, 20, 4, 0.8 ng EO cDNA from a fish with 202Hz EOD frequency.  
 611 All target genes and  $\beta$ -actin had standard curves with  $R^2 > 0.97$ . The slopes of standard curves  
 612 were used to estimate the amplification efficiencies, which were in the range between 95% and  
 613 105%. Data were analyzed using Applied Biosystems 7500/7500 Fast software. Standard  
 614 deviations were calculated by following the Applied Biosystems guide to perform relative  
 615 quantification of gene expression using relative standard curve method.

| <b>Table 2. Primers used in real-time PCR</b> |                                                               |                              |
|-----------------------------------------------|---------------------------------------------------------------|------------------------------|
| <b>Gene</b>                                   | <b>Primers</b><br>(F: forward; R: reverse)                    | <b>Amplicon Size</b><br>(bp) |
| $\beta$ -actin                                | F 5'-ATGAGGAAATCGCTGCTCTC-3'<br>R 5'-CCAACAATGGAAGGGAAGAC-3'  | 103                          |
| Na <sub>v</sub> 1.4a                          | F 5'-CAGCAAGGACAGAAAGGACA-3'<br>R 5'-CAATGGGCACATTCAGAACT-3'  | 107                          |
| Na <sub>v</sub> 1.4b                          | F 5'-AAACTGAAGGAGGAGGAGGA-3'<br>R 5'-CTTTGGGTTTCAGGCTCTTC-3'  | 98                           |
| Kir6.2                                        | F 5'-TGTTACCGACATCCACTCGT-3'<br>R 5'-GCAGACACGCATTCTTCTGT-3'  | 105                          |
| Na <sup>+</sup> /K <sup>+</sup> ATPase        | F 5'-CAGGAGACCTGGTGGAGATT-3'<br>R 5'-ACTCTCCGGTCAGAGAGGAA-3'  | 105                          |
| eSlack1                                       | F 5'-AAGAGCATGCACTGGACAAG-3'<br>R 5'-CCTCTCTGATCGACGAAACA-3'  | 108                          |
| eSlack2                                       | F 5'-GATCCCAATCGGACTGTACC-3'<br>R 5'-CGCACGAGGAACATCAAATA-3'  | 93                           |
| eSlick                                        | F 5'-ATACCCTGTTTCGGGATTGAC-3'<br>R 5'-GGCATATGACTGCAACAACC-3' | 93                           |

616

617 **Gene phylogeny analysis**

618 *E. virescens Slack1, Slack2, and Slick* cDNA sequences were translated and aligned with  
619 protein sequences of the SLO family channels in nematode, zebrafish, mouse, rat and human  
620 using ClustalW. Then the phylogenetic relationship was analyzed using the Geneious software  
621 (version 7.1.7). The consensus tree was obtained by using neighbor-joining method, Jukes  
622 Cantor amino acid substitution model and resampled 1000 times with Bootstrapping method.  
623 Human voltage gated K<sup>+</sup> channel subfamily A member 1 (hKv1.1) was included as the outgroup.  
624 Channels included in the phylogenetic analysis are *Caenorhabditis elegans* Slo1 channel (NCBI  
625 accession number: Q95V25); *Danio rerio* Slo1 channel (NP\_001139072); *Mus musculus* Slo1  
626 channel (NP\_001240287); *Rattus norvegicus* Slo1 channel (NP\_114016); *Homo sapiens* Slo1  
627 channel (AAI44497); *Caenorhabditis elegans* Slo2 channel (AAD51350); *Danio rerio* Slack  
628 channel (XP\_009293403); *Danio rerio* Slick channel (XP\_017214614); *Mus musculus* Slack  
629 channel (NP\_780671); *Mus musculus* Slick channel (NP\_001074496); *Rattus norvegicus* Slack  
630 channel (NP\_068625); *Rattus norvegicus* Slick channel (NP\_942057); *Homo sapiens* Slack  
631 channel (NP\_065873); *Homo sapiens* Slick channel (NP\_940905); *Mus musculus* Slo3 channel  
632 (O54982); *Homo sapiens* Slo3 channel (NP\_001027006); *Homo sapiens* Kv1.1 channel  
633 (NP\_000208).

#### 634 **Expression of recombinant K<sub>Na</sub> channels in electrocytes**

635 We constructed recombinant eSlack1, eSlack2 and eSlick channels tagged with the red  
636 fluorescent protein (mCherry) at their N-terminus. mCherry was PCR amplified from u-mCherry  
637 (a gift from Scott Gradia; Addgene plasmid # 29769). The polylinker sequences between ion  
638 channels and mCherry are GGSGGGSGSGS for eSlack1/ eSlick, and GGSGGGSG for  
639 eSlack2 [40, 41]. mCherry-eSlack1, mCherry-eSlack2 and mCherry-eSlick was assembled and  
640 cloned into pOX vector using the NEBuilder® HiFi DNA Assembly Master Mix (New England

641 Biolabs<sup>®</sup> Inc.), then subcloned into pmaxCloning<sup>™</sup> vector (Lonza). Prior to EO injection, the  
642 fish were anesthetized by exposing them to 0.01% clove oil until losing equilibrium but still  
643 maintaining opercular beating (< 2 min total). A single 25  $\mu$ l bolus of 5  $\mu$ g/ $\mu$ l plasmid in 150  
644 mM KCl was injected into the fish's EO in the tail using a microliter syringe. The injected fish  
645 was transferred to a bucket containing aerated water from its home tank and monitored for  
646 recovery, then transferred back to its home tank after full recovery. The expression of mCherry  
647 tagged ion channels was examined at the 10<sup>th</sup> day after injection using epifluorescence and  
648 confocal microscopy.

#### 649 **Image acquisition**

650 To examine the expression of mCherry-eSlack1, mCherry-eSlack2 and mCherry-eSlick in  
651 electrocytes, we harvested the EO using the same procedure as described earlier [37]. Live  
652 electrocytes were first examined on a Zeiss Apotome.2 microscope with a X5/0.16NA dry  
653 objective and processed by Zeiss AxioVision Rel.4.8.2. Structured illumination was used to  
654 create optical sections of the sample. Then we used LeicaTCS SP8 laser scanning confocal  
655 microscope with a X25/0.95NA dipping objective to acquire high resolution images. mCherry  
656 was excited by a 561-nm laser line and autofluorescence of electrocyte was excited by a 488-nm  
657 laser line [37]. The images were acquired as serial sections and processed by the software Leica  
658 Application Suite advanced Fluorescence (LAS AF) 3.3.0.10134. Electrocytes without  
659 expressing mcherry tagged eSlack/Slick subunits were used as control and imaged under the  
660 same settings.

661 *Xenopus laevis* oocytes expressing mCherry tagged K<sub>Na</sub> subunits were incubated in ND96  
662 saline and imaged using LeicaTCS SP8 laser scanning confocal microscope with a X10/ 0.3NA

663 dry objective. Brightness and contrast of all images were adjusted using ImageJ for 64-bit  
664 Windows (version 1.51s; National Institute of Health).

## 665 **Electrophysiology**

666 eSlack/Slick cDNA was subcloned into pOX vector (a generous gift of Dr. Lawrence B.  
667 Salkoff, Washington University, St. Louis, USA). In vitro transcribed RNA (cRNA) was  
668 prepared using the mMACHINE™ T3 Transcription Kit (Thermo Fisher  
669 Scientific). We used an Agilent 2100 Bioanalyzer to examine the quality and concentration of  
670 cRNA. Defolliculated *X. laevis* oocytes in stage VI were obtained from Ecocyte Bioscience  
671 (Austin, TX) and incubated in modified Barth's saline containing the following in mM: NaCl 88,  
672 KCl 1, NaHCO<sub>3</sub> 2.4, MgSO<sub>4</sub> 0.82, Ca(NO<sub>3</sub>)<sub>2</sub> · 4H<sub>2</sub>O 0.33, CaCl<sub>2</sub> · 2H<sub>2</sub>O 0.41, HEPES 5,  
673 CH<sub>3</sub>COCOONa 2.5, and 50 µg/ml gentamycin at pH 7.5. Oocytes were injected with 46 nl of  
674 nuclease-free water containing ~80ng of cRNA and analyzed 4 to 5 days post injection.

675 Whole cell currents from oocytes were recorded using a standard two electrode  
676 configuration [14], with an Axoclamp 900 amplifier controlled by a Digidata 1440 interface and  
677 pCLAMP10 software (Molecular Devices, Sunnyvale, CA). Data were sampled at 100 kHz and  
678 filtered at 10 kHz. Electrodes were pulled from 1.2 mm o.d. thin-wall borosilicate glass tubing,  
679 filled with 2M NaCl or KCl and had resistances of 0.5-1.2 MΩ. Oocytes were incubated in ND96  
680 saline (in mM: 96 NaCl, 2 KCl, 1 MgCl<sub>2</sub>, 1.8 CaCl<sub>2</sub> · 2H<sub>2</sub>O and 5 HEPES, pH to 7.5). To  
681 measure channel activation, oocytes were held at -90 mV, then depolarized by 400 ms voltage  
682 steps ranging from -90 mV to +80 mV in 10 mV increments every 5 s. In some experiments,  
683 cells were depolarized by a 500 ms pulse to +20 mV from a holding potential of -90 mV every  
684 10s to examine the effects of NaCl and KCl on the amplitude of whole-cell currents. The

685 activation  $\tau$  for eSlack and eSlick currents was estimated using the Clampfit fitting functions.  
686 Current traces from the start point to the peak point just before the plateau stage were fitted to a  
687 standard single-term exponential growth function. The time required to reach 62.8% of the final  
688 value was calculated as the activation  $\tau$ .

## 689 **Computational Simulations**

690 We modeled *E. virescens* electrocyte APs with a simplified version of our earlier  
691 electrocyte simulations [37]. Briefly, the electrocyte was simulated with the Hodgkin-Huxley  
692 formalism as a three-compartment cell with an active posterior compartment, a passive central  
693 compartment, and an active anterior compartment. Simulated cholinergic synaptic current was  
694 applied only to the posterior compartment and the frequency of the synaptic inputs was varied to  
695 elicit trains of simulated APs with frequencies of 150Hz to 425Hz in 25 Hz increments.

696 The capacitances for the posterior, central, and anterior compartments were 48.0 nF, 18  
697 nF, and 18 nF, respectively, based on surface area measurements from high-resolution confocal  
698 3D reconstructions of single electrocytes. Differential equations integrated via Euler's method  
699 were coded in Matlab (Mathworks, Inc. Natick MA) with integration time steps of  $5 \times 10^{-8}$  sec.  
700 The passive central compartment's current balance equation included only passive leak ( $I_L$ ) fixed  
701 at 5  $\mu$ S, and coupling to the two adjoining active compartments as in Equation 1

$$702 \quad C_m \frac{dV_c}{dt} = -I_L + g_w(V_a - V_c) + g_w(V_p - V_c) \quad (1)$$

703 where  $g_w$  is the coupling conductance, fixed at 3  $\mu$ S. The current balance equation for the  
704 posterior compartment was

$$705 \quad C_m \frac{dV_p}{dt} = I_{Syn}(t) - I_{Na} - I_L + g_w(V_c - V_p) \quad (2)$$

706 and the current balance equation for the anterior compartment was

$$707 \quad C_m \frac{dV_a}{dt} = -I_{KNa} - I_R - I_L + g_w(V_c - V_a) \quad (3)$$

708 where  $I_{Syn}$  represents synaptic current,  $I_{Na}$  is the voltage-gated  $Na^+$  current,  $I_{KNa}$  is the  $Na^+$ -  
709 activated  $K^+$  current,  $I_R$  is the inward rectifier  $K^+$  current, and  $g_w$  is the coupling current to the  
710 adjacent compartment. For all three compartments the leak current,  $I_L$ , was given by Equation 4,  
711 where  $\bar{g}_L$  was  $10 \mu S$ ,  $5 \mu S$ , and  $10 \mu S$  for the posterior, central, and anterior compartments,  
712 respectively.

$$713 \quad I_L = \bar{g}_L(V + 95) \quad (4)$$

714 The posterior-compartment synaptic current,  $I_{Syn}$ , was given by Equation 5

$$715 \quad I_{Syn} = \bar{g}_{Syn} g_{Syn(t)}(V_p - 15) \quad (5)$$

716 with  $\bar{g}_{Syn}$  fixed at  $600 \mu S$  for all models and where the time series  $g_{Syn(t)}$  was a series of alpha  
717 waveforms generated using the discrete time equation [71]:

$$718 \quad g_{Syn(n+2)} = 2 \left(1 - \frac{T}{\tau}\right) g_{Syn(n+1)} - \left(1 - \frac{T}{\tau}\right)^2 g_{Syn(n)} + \left(\frac{T}{\tau}\right)^2 x(n) \quad (6)$$

719 For this equation  $T$  is the integration time step and  $\tau$  is the time constant. The binary series  $x(n)$   
720 specified the onset times of the synaptic inputs, and the resulting time-series  $g_{Syn(n)}$  was  
721 normalized such that  $0 \leq g_{Syn(n)} \leq 1$ .

722 The voltage-dependent currents  $I_{Na}$ ,  $I_{KNa}$ , and  $I_R$  were given by Equations 7 – 9:

$$723 \quad I_{Na} = \bar{g}_{Na} m^3 h (V_p - 52) \quad (7)$$

$$724 \quad I_{KNa} = \bar{g}_{KNa} n^4 s^4 (V_a + 95) \quad (8)$$

$$725 \quad I_R = \bar{g}_R \left( \frac{1}{1 + \exp(0.22(V_a + 85))} \right) (V_a + 95) \quad (9)$$

726 The baseline values of  $\bar{g}_{Na}$ ,  $\bar{g}_{KNa}$ , and  $\bar{g}_R$ , were 2300  $\mu$ S, 2000  $\mu$ S, and 125  $\mu$ S, respectively.

727 The gating variables  $m$ ,  $h$ , and  $n$  in Equations 7 and 8 evolved in a voltage-dependent manner

728 according to Equation 10 where  $V$  is the membrane potential of the appropriate compartment ( $V_p$

729 or  $V_a$ ) and  $j = m, h$ , or  $n$

$$730 \quad \frac{dj}{dt} = \frac{j_\infty(V) - j}{\tau_j(V)} \quad (10)$$

731 The voltage-dependent values of  $j_\infty$  in Equation 10 were determined according to Equations 11-

732 13 for  $j = m, h$ , or  $n$ , respectively:

$$733 \quad m_\infty = \frac{1}{1 + \exp\left(\frac{-37.46 - V_p}{8.530}\right)} \quad (11)$$

$$734 \quad h_\infty = \frac{1}{1 + \exp\left(\frac{-48.42 - V_p}{-4.194}\right)} \quad (12)$$

$$735 \quad n_\infty = 1.494 \times \exp(0.00028 \times V_a) + (-0.7351 \times \exp(-0.00681 \times V_a)) \quad (13)$$

736 and  $\tau_j$  was given by Equations 14, 15, and 16 for  $j = m, h$ , or  $n$ , respectively.

$$737 \quad \tau_m = \frac{0.2286}{1 + \left(\frac{V_p + 83.9}{24.97}\right)^2} + 0.6128 \quad (14)$$

$$738 \quad \tau_h = 1.653 \times \exp\left(-0.5 \times \left(\frac{V_p + 120}{44.54}\right)^2\right) + 0.060 \quad (15)$$

$$739 \quad \tau_n = 0.4654 \times \exp\left(-\left(\frac{V_a + 88.73}{37.33}\right)^2\right) + 4.965 \times \exp\left(-\left(\frac{V_a + 5478}{4833}\right)^2\right) \quad (16)$$



740 All parameter values in Equation 9 and Equations 11-16 were determined by least-squares best  
741 fits to experimental data for  $I_{KNa}$  from the present study for  $j = n$  and were determined by least-  
742 squares best fits to previous experimental recordings of  $I_{Na}$  in *E. virescens* electrocytes [14] for  $j$   
743  $= m$  and  $h$ . We previously modeled the  $Na^+$ -dependence of  $g_{KNa}$  with the gating variable,  $s$ , which  
744 is determined by the  $Na^+$  concentration in the bulk cytoplasm in the anterior compartment [37].  
745 In those simulations, however, there were no significant changes in  $Na^+$  concentration. We  
746 therefore did not model changes in  $Na^+$  concentrations in the present model and the  $Na^+$  gating  
747 variable  $s$  was therefore fixed at 0.7895, in accordance with the fixed anterior compartment  $Na^+$   
748 concentration of 15 mM.

749 The values of  $\bar{g}_{Na}$ ,  $\bar{g}_{KNa}$ , and  $\bar{g}_R$ , were scaled according to AP frequency in some  
750 models, and held constant in other models. Values of these parameters were given by Equations  
751 17-19, where  $x$  denotes AP frequency:

$$752 \quad \bar{g}_{Na} = (0.264e^{0.0057x}) \times 2300 + 700 \quad (17)$$

$$753 \quad \bar{g}_{KNa} = (0.672e^{0.0041x}) \times 2000 \quad (18)$$

$$754 \quad \bar{g}_R = (0.235e^{0.0067x}) \times 100 \quad (19)$$

755 The base and exponential parameters in Equations 17-19 are based on RNA expression data from  
756 the present study. The remaining constants in each equation were selected to produce an AP train  
757 where the AP duration was one-half of the interspike interval at an AP frequency where  $x = 150$   
758 Hz. In models where values of  $\bar{g}_{Na}$ ,  $\bar{g}_{KNa}$ , and/or  $\bar{g}_R$ , were held constant, the value of  $x$  was  
759 fixed at 150 regardless of AP frequency.

760           To determine the required activity of the Na,K-ATPase to restore ionic gradients between  
761    APs, we calculated total Na<sup>+</sup> entry via the voltage-gated Na<sup>+</sup> conductance during each AP as  
762    moles of Na<sup>+</sup> by multiplying the integrated Na<sup>+</sup> current (in nA\*ms) by 10<sup>-12</sup> to yield Coulombs of  
763    charge, then dividing by the elementary charge on a monovalent cation,  $e$ , to yield the number of  
764    Na<sup>+</sup> ions, then dividing by Avogadro's constant,  $L$ , to yield moles of Na<sup>+</sup>.

765

## ACKNOWLEDGEMENTS

766       The authors declare no conflict of interest and no competing financial interests. Financial  
767 support and equipment were provided by NSF grants IOS1350753, and IOS 1644965 (M.R.M.).  
768 This research was also supported in part by a grant from the Research Council of the University  
769 of Oklahoma Norman Campus. We thank in particular Lawrence Salkoff for the gift of pOX  
770 vector, David McCauley for valuable suggestions on experimental design, and Tingting Gu for  
771 imaging assistance. Thanks to Austin McCauley and Shannon Wisner for fish care, Tian Yuan and  
772 Mehrnoush Nourbakhsh for help in molecular cloning, Rosemary Knapp for use of her cryostat,  
773 and J.P. Masly for use of his microscope.

774

## REFERENCES

775 1. Niven JE. Neuronal energy consumption: biophysics, efficiency and evolution. *Curr Opin*

776 *Neurobiol.* 2016;41:129-35. doi: [dx.doi.org/10.1016/j.conb.2016.09.004](https://doi.org/10.1016/j.conb.2016.09.004).

777 2. Niven JE, Laughlin SB. Energy limitation as a selective pressure on the evolution of

778 sensory systems. *J Exp Biol.* 2008;211(Pt 11):1792-804. Epub 2008/05/21. doi: [10.1016/j.jeb.2008.05.004](https://doi.org/10.1016/j.jeb.2008.05.004)

779 [[pii](https://pubmed.ncbi.nlm.nih.gov/18490395/)]10.1242/jeb.017574. PubMed PMID: 18490395.

780 3. Buzsaki G, Draguhn A. Neuronal oscillations in cortical networks. *Science.*

781 2004;304(5679):1926-9. Epub 2004/06/26. doi: [10.1126/science.1099745](https://doi.org/10.1126/science.1099745). PubMed PMID:

782 15218136.

783 4. Kann O, Papageorgiou IE, Draguhn A. Highly energized inhibitory interneurons are a

784 central element for information processing in cortical networks. *J Cereb Blood Flow Metab.*

785 2014;34(8):1270-82. Epub 2014/06/05. doi: [10.1038/jcbfm.2014.104](https://doi.org/10.1038/jcbfm.2014.104). PubMed PMID:

786 24896567; PubMed Central PMCID: [PMCPMC4126088](https://pubmed.ncbi.nlm.nih.gov/24896567/).

787 5. Hu H, Gan J, Jonas P. Interneurons. Fast-spiking, parvalbumin(+) GABAergic

788 interneurons: from cellular design to microcircuit function. *Science.* 2014;345(6196):1255263.

789 Epub 2014/08/02. doi: [10.1126/science.1255263](https://doi.org/10.1126/science.1255263). PubMed PMID: 25082707.

790 6. Carter BC, Bean BP. Sodium entry during action potentials of mammalian neurons:

791 Incomplete inactivation and reduced metabolic efficiency in fast-spiking neurons. *Neuron.*

792 2009;64(6):898-909. Epub 2010/01/13. doi: [10.1016/j.neuron.2009.12.011](https://doi.org/10.1016/j.neuron.2009.12.011). PubMed PMID:

793 20064395; PubMed Central PMCID: [PMC2810867](https://pubmed.ncbi.nlm.nih.gov/20064395/).

794 7. Hopkins CD. Electric communication: functions in the social behavior of *Eigenmannia*

795 *virescens*. *Behaviour.* 1974:270-305.

- 796 8. Scheich H. Neural basis of communication in the high frequency electric fish,  
797 *Eigenmannia virescens* (jamming avoidance response). *Journal of comparative physiology*.  
798 1977;113(2):181-206.
- 799 9. Helfman G, Collette BB, Facey DE, Bowen BW. *The diversity of fishes: biology,*  
800 *evolution, and ecology*: John Wiley & Sons; 2009.
- 801 10. Stoddard PK, Markham MR. Signal cloaking by electric fish. *Bioscience*.  
802 2008;58(5):415-25.
- 803 11. Lewis JE, Gilmour KM, Moorhead MJ, Perry SF, Markham MR. Action potential  
804 energetics at the organismal level reveal a trade-off in efficiency at high firing rates. *J Neurosci*.  
805 2014;34(1):197-201. doi: 10.1523/jneurosci.3180-13.2014.
- 806 12. Wang B, Ke W, Guang J, Chen G, Yin L, Deng S, et al. Firing Frequency Maxima of  
807 Fast-Spiking Neurons in Human, Monkey, and Mouse Neocortex. *Front Cell Neurosci*.  
808 2016;10:239. Epub 2016/11/03. doi: 10.3389/fncel.2016.00239. PubMed PMID: 27803650;  
809 PubMed Central PMCID: PMC5067378.
- 810 13. Wu SH, Kelly JB. Response of neurons in the lateral superior olive and medial nucleus of  
811 the trapezoid body to repetitive stimulation: intracellular and extracellular recordings from  
812 mouse brain slice. *Hear Res*. 1993;68(2):189-201. Epub 1993/08/01. doi: 10.1016/0378-  
813 5955(93)90123-i. PubMed PMID: 8407605.
- 814 14. Markham MR, Kaczmarek LK, Zakon HH. A sodium-activated potassium channel  
815 supports high-frequency firing and reduces energetic costs during rapid modulations of action  
816 potential amplitude. *Journal of neurophysiology*. 2013;109(7):1713-23.
- 817 15. Ferrari MB, Zakon HH. Conductances contributing to the action potential of *Sternopygus*  
818 electrocytes. *J Comp Physiol, A*. 1993;173(3):281-92. PubMed Central PMCID: PMC0008.

- 819 16. Sierra F, Comas V, Buno W, Macadar O. Voltage-gated potassium conductances in  
820 *Gymnotus* electrocytes. *Neuroscience*. 2007;145(2):453-63. Epub 2007/01/16. doi:  
821 10.1016/j.neuroscience.2006.12.002. PubMed PMID: 17222982.
- 822 17. Markham MR, Zakon HH. Ionic mechanisms of microsecond-scale spike timing in single  
823 cells. *J Neurosci*. 2014;34(19):6668-78. doi: 10.1523/jneurosci.0615-14.2014.
- 824 18. Bean BP. The action potential in mammalian central neurons. *Nature Reviews*  
825 *Neuroscience*. 2007;8(6):451-65.
- 826 19. Coetzee WA, Amarillo Y, Chiu J, Chow A, Lau D, McCormack T, et al. Molecular  
827 diversity of K<sup>+</sup> channels. *Annals of the New York Academy of Sciences*. 1999;868(1):233-55.
- 828 20. Erisir A, Lau D, Rudy B, Leonard C. Function of specific K<sup>+</sup> channels in sustained high-  
829 frequency firing of fast-spiking neocortical interneurons. *Journal of neurophysiology*.  
830 1999;82(5):2476-89.
- 831 21. Few WP, Zakon HH. Sex differences in and hormonal regulation of Kv1 potassium  
832 channel gene expression in the electric organ: molecular control of a social signal.  
833 *Developmental neurobiology*. 2007;67(5):535-49.
- 834 22. Kaczmarek LK, Bhattacharjee A, Desai R, Gan L, Song P, von Hehn CA, et al.  
835 Regulation of the timing of MNTB neurons by short-term and long-term modulation of  
836 potassium channels. *Hearing research*. 2005;206(1):133-45.
- 837 23. Shao LR, Halvorsrud R, Borg - Graham L, Storm JF. The role of BK - type Ca<sup>2+</sup> -  
838 dependent K<sup>+</sup> channels in spike broadening during repetitive firing in rat hippocampal pyramidal  
839 cells. *The Journal of Physiology*. 1999;521(1):135-46.

- 840 24. Joiner WJ, Tang MD, Wang L-Y, Dworetzky SI, Boissard CG, Gan L, et al. Formation of  
841 intermediate-conductance calcium-activated potassium channels by interaction of Slack and Slo  
842 subunits. *Nature neuroscience*. 1998;1(6):462-9.
- 843 25. Bhattacharjee A, Joiner WJ, Wu M, Yang Y, Sigworth FJ, Kaczmarek LK. Slick (Slo2.  
844 1), a rapidly-gating sodium-activated potassium channel inhibited by ATP. *The Journal of*  
845 *neuroscience*. 2003;23(37):11681-91.
- 846 26. Zakon HH, Lu Y, Zwickl DJ, Hillis DM. Sodium channel genes and the evolution of  
847 diversity in communication signals of electric fishes: convergent molecular evolution.  
848 *Proceedings of the National Academy of Sciences of the United States of America*.  
849 2006;103(10):3675-80.
- 850 27. Bennett MV. Comparative physiology: electric organs. *Annual review of physiology*.  
851 1970;32(1):471-528.
- 852 28. Gallant JR, Traeger LL, Volkening JD, Moffett H, Chen P-H, Novina CD, et al. Genomic  
853 basis for the convergent evolution of electric organs. *Science*. 2014;344(6191):1522-5.
- 854 29. Unguez GA, Zakon HH. Reexpression of myogenic proteins in mature electric organ  
855 after removal of neural input. *The Journal of neuroscience*. 1998;18(23):9924-35.
- 856 30. Brown MR, Kronengold J, Gazula VR, Spilianakis CG, Flavell RA, Von Hehn CA, et al.  
857 Amino - termini isoforms of the Slack K<sup>+</sup> channel, regulated by alternative promoters,  
858 differentially modulate rhythmic firing and adaptation. *The Journal of physiology*.  
859 2008;586(21):5161-79.
- 860 31. Hite RK, Yuan P, Li Z, Hsuing Y, Walz T, MacKinnon R. Cryo-electron microscopy  
861 structure of the Slo2. 2 Na<sup>+</sup>-activated K<sup>+</sup> channel. *Nature*. 2015;527(7577):198-203.

- 862 32. Hofmann K, Stoffel W. TMbase-A database of membrane spanning protein segments.  
863 1993.
- 864 33. Krogh A, Larsson B, Von Heijne G, Sonnhammer EL. Predicting transmembrane protein  
865 topology with a hidden Markov model: application to complete genomes. *Journal of molecular*  
866 *biology*. 2001;305(3):567-80.
- 867 34. Zhang Z, Rosenhouse-Dantsker A, Tang Q-Y, Noskov S, Logothetis DE. The RCK2  
868 domain uses a coordination site present in Kir channels to confer sodium sensitivity to Slo2. 2  
869 channels. *The Journal of Neuroscience*. 2010;30(22):7554-62.
- 870 35. Thomson SJ, Angela H, Sanguinetti MC. Identification of the Intracellular Na<sup>+</sup> Sensor in  
871 Slo2. 1 Potassium Channels. *Journal of Biological Chemistry*. 2015;jbc. M115. 653089.
- 872 36. Walker JE, Saraste M, Runswick MJ, Gay NJ. Distantly related sequences in the alpha-  
873 and beta-subunits of ATP synthase, myosin, kinases and other ATP-requiring enzymes and a  
874 common nucleotide binding fold. *The EMBO journal*. 1982;1(8):945.
- 875 37. Ban Y, Smith BE, Markham MR, Ban Y. A highly-polarized excitable cell separates  
876 sodium channels from sodium-activated potassium channels by more than a millimeter. *Journal*  
877 *of neurophysiology*. 2015;jn. 00475.2014.
- 878 38. Ban Y, Smith BE, Markham MR. A highly polarized excitable cell separates sodium  
879 channels from sodium-activated potassium channels by more than a millimeter. *J Neurophysiol*.  
880 2015;114(1):520-30.
- 881 39. Sudha PM, Low S, Kwang J, Gong Z. Multiple tissue transformation in adult zebrafish by  
882 gene gun bombardment and muscular injection of naked DNA. *Marine Biotechnology*.  
883 2001;3(2):119-25.



- 884 40. Shi S-H, Hayashi Y, Petralia RS, Zaman SH, Wenthold RJ, Svoboda K, et al. Rapid spine  
885 delivery and redistribution of AMPA receptors after synaptic NMDA receptor activation.  
886 *Science*. 1999;284(5421):1811-6.
- 887 41. Perestenko PV, Henley JM. 7 Visualization of AMPAR Trafficking and Surface  
888 Expression. *The Dynamic Synapse: Molecular Methods in Ionotropic Receptor Biology*.  
889 2006:119.
- 890 42. Nuwer MO, Picchione KE, Bhattacharjee A. PKA-induced internalization of slack KNa  
891 channels produces dorsal root ganglion neuron hyperexcitability. *The Journal of Neuroscience*.  
892 2010;30(42):14165-72.
- 893 43. Cristofori-Armstrong B, Soh MS, Talwar S, Brown DL, Griffin JD, Dekan Z, et al.  
894 *Xenopus borealis* as an alternative source of oocytes for biophysical and pharmacological studies  
895 of neuronal ion channels. *Scientific reports*. 2015;5:14763.
- 896 44. Egan T, Dagan D, Kupper J, Levitan I. Properties and rundown of sodium-activated  
897 potassium channels in rat olfactory bulb neurons. *J Neurosci*. 1992;12(5):1964-76.
- 898 45. Garg P, Gardner A, Garg V, Sanguinetti MC. Structural basis of ion permeation gating in  
899 Slo2. 1 K<sup>+</sup> channels. *The Journal of general physiology*. 2013;142(5):523-42.
- 900 46. Weber W-M. Ion currents of *Xenopus laevis* oocytes: state of the art. *Biochimica et*  
901 *Biophysica Acta (BBA)-Biomembranes*. 1999;1421(2):213-33.
- 902 47. Hasenstaub A, Otte S, Callaway E, Sejnowski TJ. Metabolic cost as a unifying principle  
903 governing neuronal biophysics. *Proc Natl Acad Sci U S A*. 2010;107(27):12329-34. Epub  
904 2010/07/10. doi: 10.1073/pnas.0914886107. PubMed PMID: 20616090; PubMed Central  
905 PMCID: PMC2901447.

- 906 48. Arnegard ME, Zwickl DJ, Lu Y, Zakon HH. Old gene duplication facilitates origin and  
907 diversification of an innovative communication system--twice. *Proc Natl Acad Sci USA*.  
908 2010;107(51):22172-7. Epub 2010/12/04. doi: 10.1073/pnas.1011803107. PubMed PMID:  
909 21127261; PubMed Central PMCID: PMC3009798.
- 910 49. Sakura H, Ammala C, Smith PA, Gribble FM, Ashcroft FM. Cloning and functional  
911 expression of the cDNA encoding a novel ATP-sensitive potassium channel subunit expressed in  
912 pancreatic beta-cells, brain, heart and skeletal muscle. *FEBS Lett*. 1995;377(3):338-44. Epub  
913 1995/12/27. doi: 10.1016/0014-5793(95)01369-5. PubMed PMID: 8549751.
- 914 50. Ashcroft FM, Gribble FM. Correlating structure and function in ATP-sensitive K<sup>+</sup>  
915 channels. *Trends Neurosci*. 1998;21(7):288-94. Epub 1998/07/31. PubMed PMID: 9683320.
- 916 51. Inagaki N, Tsuura Y, Namba N, Masuda K, Gono T, Horie M, et al. Cloning and  
917 functional characterization of a novel ATP-sensitive potassium channel ubiquitously expressed  
918 in rat tissues, including pancreatic islets, pituitary, skeletal muscle, and heart. *Journal of*  
919 *Biological Chemistry*. 1995;270(11):5691-4.
- 920 52. Kane GC, Liu XK, Yamada S, Olson TM, Terzic A. Cardiac KATP channels in health  
921 and disease. *J Mol Cell Cardiol*. 2005;38(6):937-43. Epub 2005/05/25. doi:  
922 10.1016/j.yjmcc.2005.02.026. PubMed PMID: 15910878; PubMed Central PMCID:  
923 PMCPMC2736958.
- 924 53. Hallermann S, de Kock CP, Stuart GJ, Kole MH. State and location dependence of action  
925 potential metabolic cost in cortical pyramidal neurons. *Nature neuroscience*. 2012;15(7):1007-  
926 14.
- 927 54. Howarth C, Gleeson P, Attwell D. Updated energy budgets for neural computation in the  
928 neocortex and cerebellum. *Journal of Cerebral Blood Flow & Metabolism*. 2012;32(7):1222-32.

- 929 55. Hu H, Roth FC, Vandael D, Jonas P. Complementary Tuning of Na(+) and K(+) Channel  
930 Gating Underlies Fast and Energy-Efficient Action Potentials in GABAergic Interneuron Axons.  
931 *Neuron*. 2018;98(1):156-65 e6. Epub 2018/04/06. doi: 10.1016/j.neuron.2018.02.024. PubMed  
932 PMID: 29621485; PubMed Central PMCID: PMC5896255.
- 933 56. Brown MR, Kaczmarek LK. Potassium channel modulation and auditory processing.  
934 *Hearing Res*. 2011;279(1-2):32-42. Epub 2011/03/19. doi: 10.1016/j.heares.2011.03.004.  
935 PubMed PMID: 21414395; PubMed Central PMCID: PMC3137660.
- 936 57. Crampton WGR. Effects of anoxia on the distribution, respiratory strategies and electric  
937 signal diversity of gymnotiform fishes. *J Fish Biol*. 1998;53(sa):307-30. doi: doi:10.1111/j.1095-  
938 8649.1998.tb01034.x.
- 939 58. Reardon EE, Parisi A, Krahe R, Chapman LJ. Energetic constraints on electric signalling  
940 in wave-type weakly electric fishes. *J Exp Biol*. 2011;214(Pt 24):4141-50. Epub 2011/11/26. doi:  
941 10.1242/jeb.059444. PubMed PMID: 22116756.
- 942 59. Sinnott PM, Markham MR. Food deprivation reduces and leptin increases the amplitude  
943 of an active sensory and communication signal in a weakly electric fish. *Horm Behav*.  
944 2015;71:31-40. Epub 2015/04/15. doi: 10.1016/j.yhbeh.2015.03.010. PubMed PMID: 25870018.
- 945 60. Chen H, Kronengold J, Yan Y, Gazula V-R, Brown MR, Ma L, et al. The N-terminal  
946 domain of Slack determines the formation and trafficking of Slick/Slack heteromeric sodium-  
947 activated potassium channels. *The Journal of Neuroscience*. 2009;29(17):5654-65.
- 948 61. Few WP, Zakon HH. Sex differences in and hormonal regulation of Kv1 potassium  
949 channel gene expression in the electric organ: Molecular control of a social signal. *Dev*  
950 *Neurobiol*. 2007;67(5):535-49. doi: 10.1002/dneu.20305. PubMed PMID: 17443807.

- 951 62. Liu H, Wu MM, Zakon HH. A novel Na<sup>+</sup> channel splice form contributes to the  
952 regulation of an androgen-dependent social signal. *J Neurosci*. 2008;28(37):9173-82. Epub  
953 2008/09/12. doi: 10.1523/JNEUROSCI.2783-08.2008. PubMed PMID: 18784298; PubMed  
954 Central PMCID: PMC2615813.
- 955 63. Liu H, Wu MM, Zakon HH. Individual variation and hormonal modulation of a sodium  
956 channel beta subunit in the electric organ correlate with variation in a social signal. *Dev*  
957 *Neurobiol*. 2007;67(10):1289-304. Epub 2007/07/20. doi: 10.1002/dneu.20404. PubMed PMID:  
958 17638382.
- 959 64. Marder E, Goaillard J-M. Variability, compensation and homeostasis in neuron and  
960 network function. *Nat Rev Neurosci*. 2006;7(7):563.
- 961 65. Khorkova O, Golowasch J. Neuromodulators, not activity, control coordinated expression  
962 of ionic currents. *J Neurosci*. 2007;27(32):8709-18. Epub 2007/08/10. doi: 27/32/8709 [pii]  
963 10.1523/JNEUROSCI.1274-07.2007. PubMed PMID: 17687048.
- 964 66. MacLean JN, Zhang Y, Johnson BR, Harris-Warrick RM. Activity-independent  
965 homeostasis in rhythmically active neurons. *Neuron*. 2003;37(1):109-20. Epub 2003/01/16.  
966 PubMed PMID: 12526777.
- 967 67. Santin JM, Schulz DJ. Membrane Voltage Is a Direct Feedback Signal That Influences  
968 Correlated Ion Channel Expression in Neurons. *Curr Biol*. 2019;29(10):1683-8.e2. doi:  
969 10.1016/j.cub.2019.04.008.
- 970 68. Howarth C, Gleeson P, Attwell D. Updated energy budgets for neural computation in the  
971 neocortex and cerebellum. *J Cereb Blood Flow Metab*. 2012;32(7):1222-32. Epub 2012/03/22.  
972 doi: 10.1038/jcbfm.2012.35. PubMed PMID: 22434069; PubMed Central PMCID:  
973 PMC3390818.

- 974 69. Aranda PS, LaJoie DM, Jorcyk CL. Bleach gel: a simple agarose gel for analyzing RNA  
975 quality. *Electrophoresis*. 2012;33(2):366-9.
- 976 70. Altschul SF, Gish W, Miller W, Myers EW, Lipman DJ. Basic local alignment search  
977 tool. *Journal of molecular biology*. 1990;215(3):403-10.
- 978 71. Graham BP, Redman SJ. Dynamic Behavior of a Model of the Muscle Stretch Reflex.  
979 *Neural Networks*. 1993;6(7):947-62. PubMed PMID: WOS:A1993MB03000005.
- 980
